# Supplementary material
Source: PubMed Central journal article supplement (PMC8043574)
Supplement: mmc1.pdf [file mmc1.pdf]

**Cell Reports, Volume 35**

**Supplemental information**

**SARS-CoV-2 infection of primary  
human lung epithelium for COVID-19  
modeling and drug discovery**

**Apoorva Mulay, Bindu Konda, Gustavo Garcia Jr., Changfu Yao, Stephen Beil, Jaquelyn M. Villalba, Colin Koziol, Chandani Sen, Arunima Purkayastha, Jay. K. Kolls, Derek A. Pociask, Patrizia Pessina, Julio Sainz de Aja, Carolina Garcia-de-Alba, Carla F. Kim, Brigitte Gomperts, Vaithilingaraja Arumugaswami, and Barry R. Stripp**

## Supplemental files

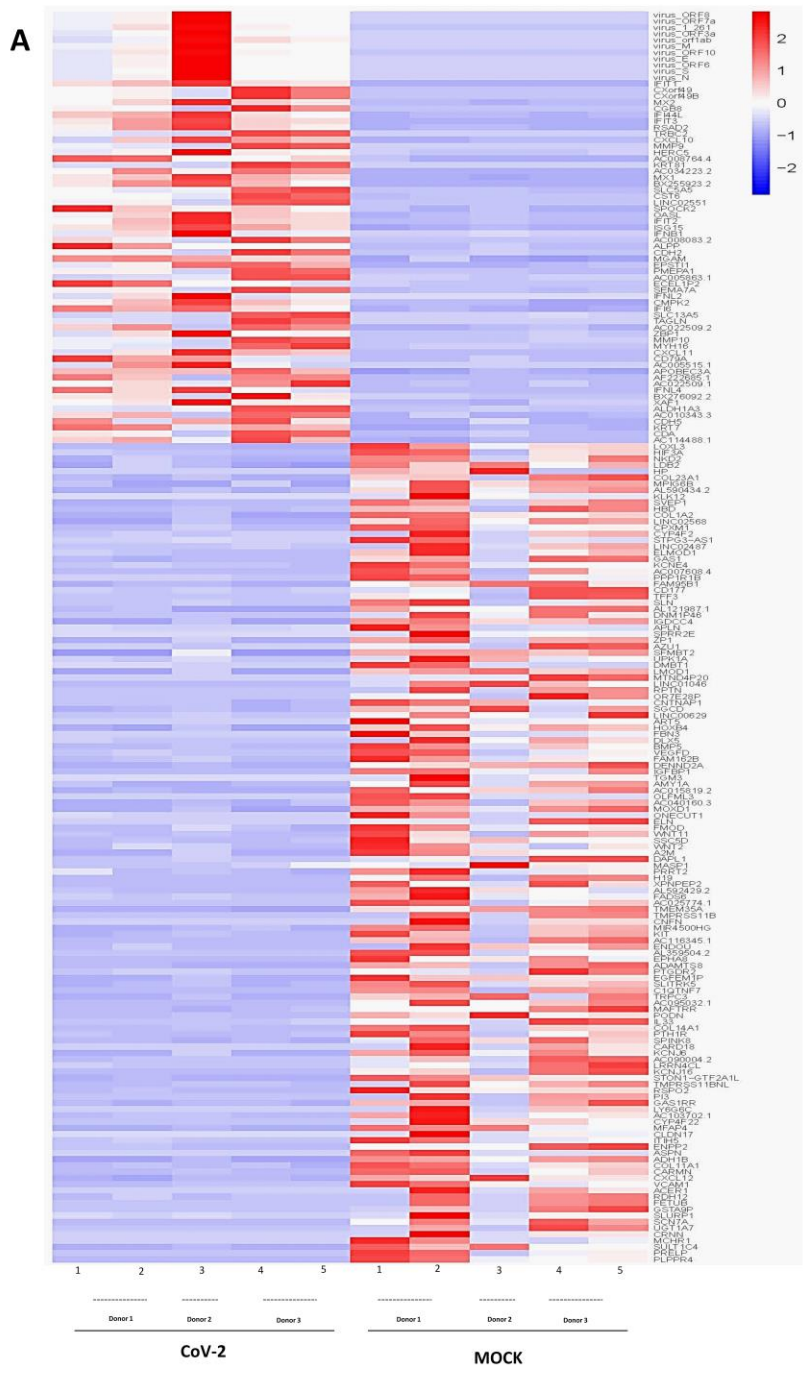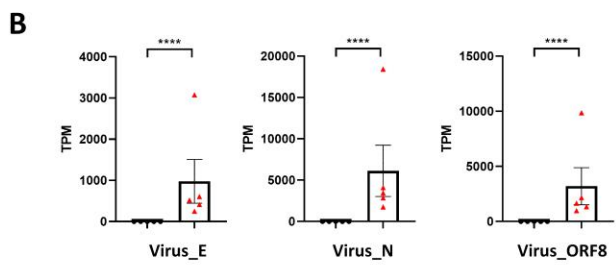

1  
2

**Fig. S1. Differential expression of genes between SARS-CoV-2 and MOCK infected samples, Related to Figure 3**

**A**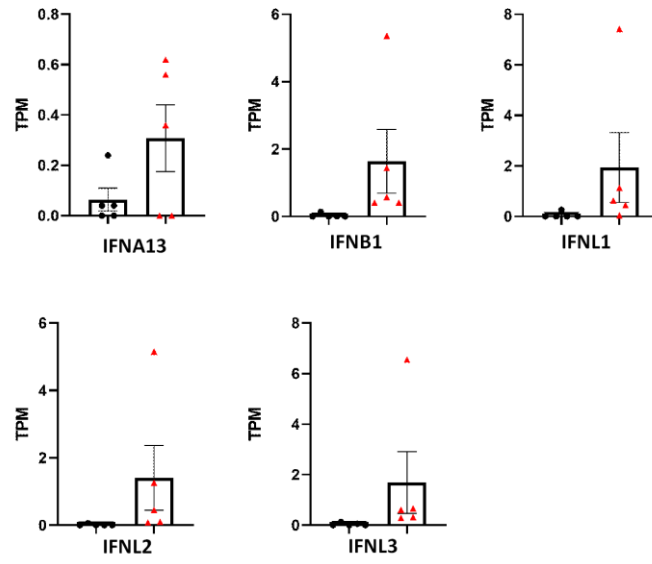**B**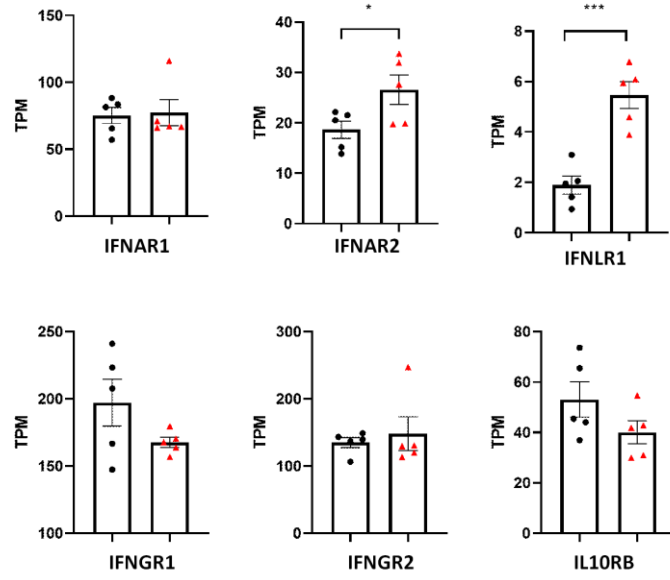**C**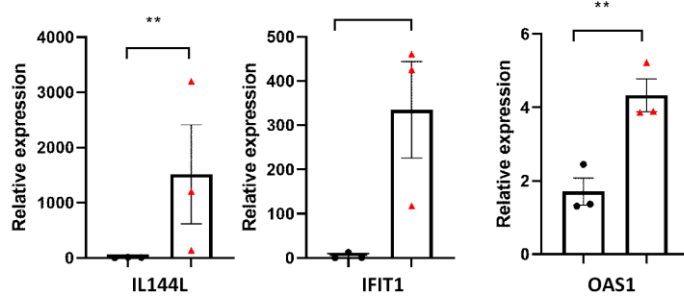

1  
2

**Fig. S2. SARS-CoV-2 induces an interferon proinflammatory response in AT2 cells, Related to Figure 3.**

1  
2

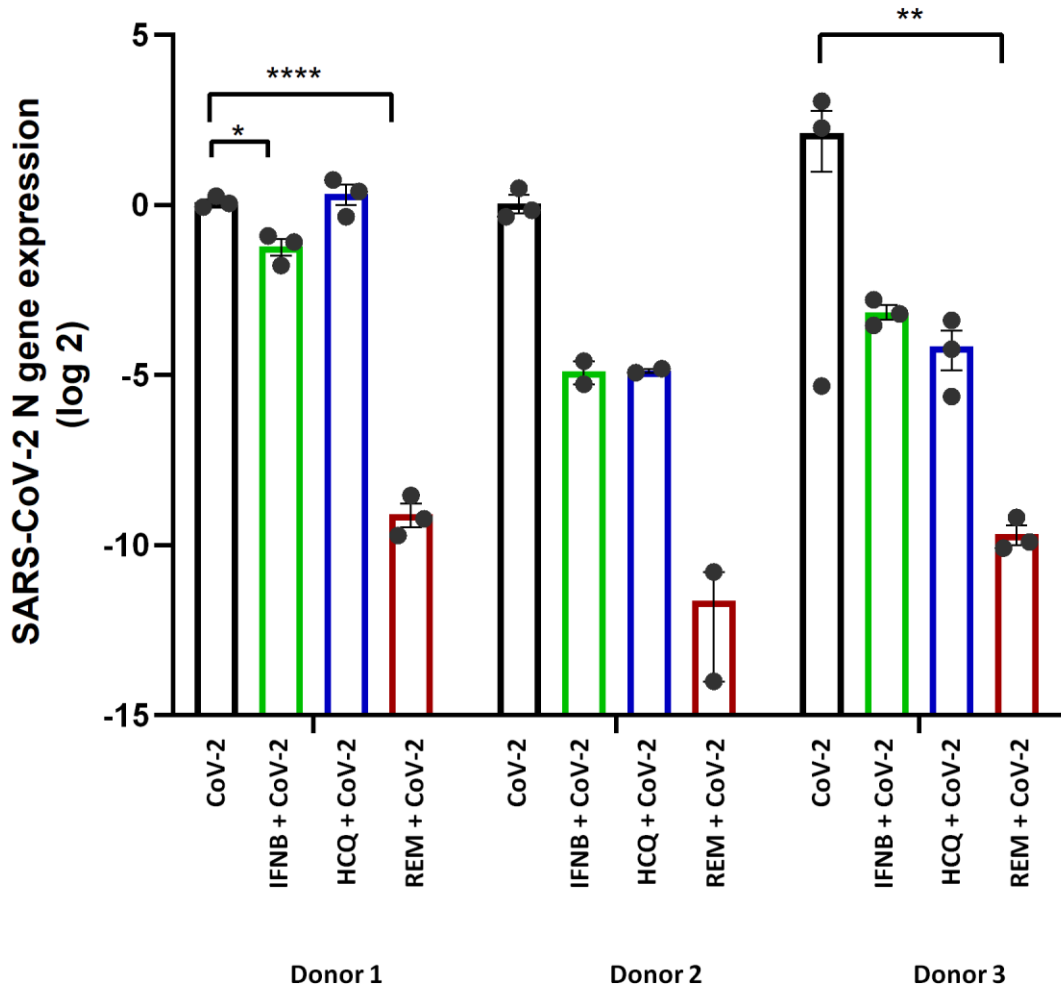

3

4

Fig. S3. Effect of drugs on alveolar cultures from individual biological replicates, Related to Figure 4.

| Gene         | Forward primer              | Reverse primer                  |
|--------------|-----------------------------|---------------------------------|
| 2019-nCoV_N1 | GAC CCC AAA ATC AGC GAA AT  | TCT GGT TAC TGC CAG TTG AAT CTG |
| GAPDH        | CCA CCT TTG ACG CTG GG      | CAT ACC AGG AAA TGA GCT TGA CA  |
| IFI44L_FWD   | TGA CTT CTC AAA GCC GGG TC  | AAA AAT CAT CTG CAG CCC GC      |
| IFIT1_FWD    | CCT CAG TCT TGC AGC CTC TC  | GCA GTG CAG AAA GTG AGA CC      |
| OAS1         | TTC GGA CGG TCT TGG AAT TAG | GCT GCC TTC TCA GGT ACT TT      |

1  
2  
3  
4  
5

**Table S1. List of primer sequences used for RT-qPCRs, Related to STAR methods section ‘Real Time Quantitative PCR(RT-PCR)’**
