# Supplementary material
Source: PubMed Central journal article supplement (PMC8043574)
Supplement: mmc2.pdf [file mmc2.pdf]

# Cell Reports

## SARS-CoV-2 infection of primary human lung epithelium for COVID-19 modeling and drug discovery

### Graphical abstract

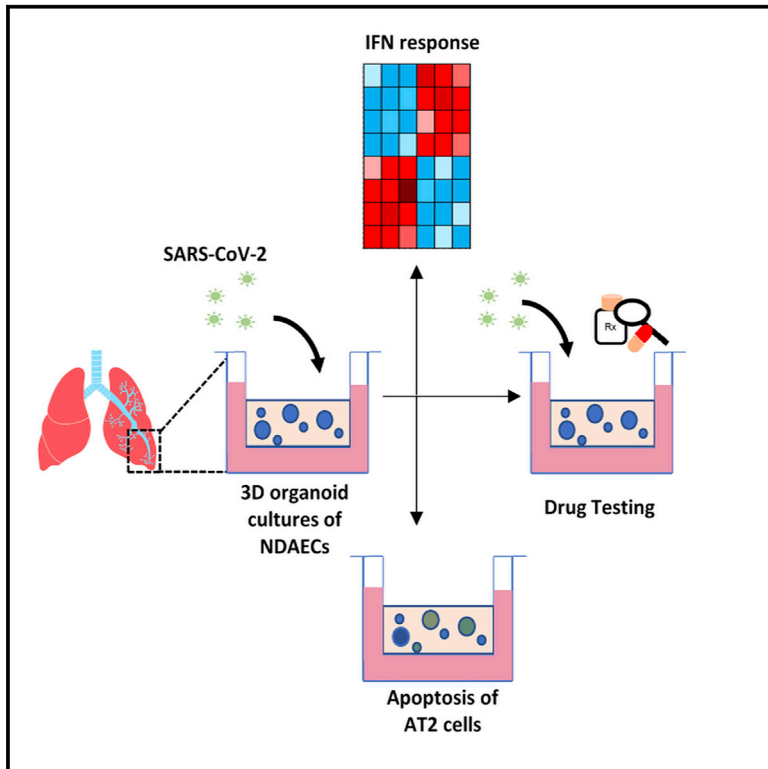

### Authors

Apoorva Mulay, Bindu Konda, Gustavo Garcia, Jr., ..., Brigitte Gomperts, Vaithilingaraja Arumugaswami, Barry R. Stripp

### Correspondence

varumugaswami@mednet.ucla.edu (V.A.),  
barry.stripp@cshs.org (B.R.S.)

### In brief

*In vitro* models of human lung epithelium, including diverse cell types of the proximo-distal axis, are critical for modeling infection. Mulay et al. show that alveospheres, with epithelial type 2- and type 1-like cells, are infected by SARS-CoV-2, initiating an interferon response, and serve as a platform for screening antiviral drugs.

### Highlights

- Human alveospheres are composed of renewing AT2 cells and AT1-like cells
- Alveolar epithelial cells are efficiently infected by SARS-CoV-2 *in vitro*
- Interferon signaling is activated in SARS-CoV-2-infected alveolar epithelial cells
- Lung organoid models provide a platform for drug discovery and disease modeling

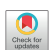

## Resource

# SARS-CoV-2 infection of primary human lung epithelium for COVID-19 modeling and drug discovery

Apoorva Mulay,<sup>1,11</sup> Bindu Konda,<sup>1,11</sup> Gustavo Garcia, Jr.,<sup>2</sup> Changfu Yao,<sup>1</sup> Stephen Beil,<sup>1</sup> Jaquelyn M. Villalba,<sup>1,10</sup> Colin Koziol,<sup>1</sup> Chandani Sen,<sup>3</sup> Arunima Purkayastha,<sup>3</sup> Jay. K. Kolls,<sup>4</sup> Derek A. Pociask,<sup>4</sup> Patrizia Pessina,<sup>5,6,7</sup> Julio Sainz de Aja,<sup>5,6,7</sup> Carolina Garcia-de-Alba,<sup>5,6,7</sup> Carla F. Kim,<sup>5,6,7</sup> Brigitte Gomperts,<sup>3,8,9</sup> Vaithilingaraja Arumugaswami,<sup>2,9,\*</sup> and Barry R. Stripp<sup>1,12,\*</sup>

<sup>1</sup>Lung and Regenerative Medicine Institutes, Cedars-Sinai Medical Center, Los Angeles, CA 90048, USA

<sup>2</sup>Department of Molecular and Medical Pharmacology, University of California, Los Angeles, CA 90095, USA

<sup>3</sup>UCLA Children's Discovery and Innovation Institute, Mattel Children's Hospital UCLA, Department of Pediatrics, David Geffen School of Medicine, UCLA, Los Angeles, CA 90095, USA

<sup>4</sup>Tulane School of Medicine, New Orleans, LA 70112, USA

<sup>5</sup>Stem Cell Program and Divisions of Hematology/Oncology and Pulmonary & Respiratory Diseases, Boston Children's Hospital, Boston, MA 02115, USA

<sup>6</sup>Harvard Stem Cell Institute, Cambridge, MA 02138, USA

<sup>7</sup>Department of Genetics, Harvard Medical School, Boston, MA 02115, USA

<sup>8</sup>Jonsson Comprehensive Cancer Center, UCLA, Los Angeles, CA 90095, USA

<sup>9</sup>Eli and Edythe Broad, Center of Regenerative Medicine and Stem Cell Research, UCLA, Los Angeles, CA 90095, USA

<sup>10</sup>California State University, Long Beach, CA, USA

<sup>11</sup>These authors contributed equally

<sup>12</sup>Lead contact

\*Correspondence: [varumugaswami@mednet.ucla.edu](mailto:varumugaswami@mednet.ucla.edu) (V.A.), [barry.stripp@cshs.org](mailto:barry.stripp@cshs.org) (B.R.S.)

<https://doi.org/10.1016/j.celrep.2021.109055>

## SUMMARY

Coronavirus disease 2019 (COVID-19) is the latest respiratory pandemic caused by severe acute respiratory syndrome-related coronavirus 2 (SARS-CoV-2). Although infection initiates in the proximal airways, severe and sometimes fatal symptoms of the disease are caused by infection of the alveolar type 2 (AT2) cells of the distal lung and associated inflammation. In this study, we develop primary human lung epithelial infection models to understand initial responses of proximal and distal lung epithelium to SARS-CoV-2 infection. Differentiated air-liquid interface (ALI) cultures of proximal airway epithelium and alveosphere cultures of distal lung AT2 cells are readily infected by SARS-CoV-2, leading to an epithelial cell-autonomous proinflammatory response with increased expression of interferon signaling genes. Studies to validate the efficacy of selected candidate COVID-19 drugs confirm that remdesivir strongly suppresses viral infection/replication. We provide a relevant platform for study of COVID-19 pathobiology and for rapid drug screening against SARS-CoV-2 and emergent respiratory pathogens.

## INTRODUCTION

Coronavirus disease 2019 (COVID-19), caused by infection with the severe acute respiratory syndrome-related coronavirus 2 (SARS-CoV-2) virus, is the most recent of a series of severe viral infections that typically initiate in the upper respiratory tract but have the potential to cause life-threatening pneumonia as a result of infection and inflammation of the lower respiratory tract (Zhou et al., 2020; Tay et al., 2020). Unlike human coronaviruses that lead to a self-limiting upper respiratory tract infection, SARS-CoV-2 and related viruses SARS-CoV and middle eastern respiratory syndrome coronavirus (MERS-CoV) are thought to originate from bats and cause severe symptoms in their human hosts because of lack of host-pathogen adaptation (Cui et al., 2019). Similar zoonotic transmission of other respiratory

pathogens, such as H1N1 influenza A virus (Vijaykrishna et al., 2010), is associated with recurrent pandemics with severe pulmonary complications seen among infected individuals caused by infection of the lower respiratory tract. Even though acute viral pneumonia appears to be a common pathological outcome of infection with these severe respiratory viruses, mechanisms leading to these adverse outcomes are poorly understood. Model systems that can closely mimic the physiology and host response in the different compartments of the lung are critical to understanding the pathogenesis of SARS-CoV-2 and for rapid drug testing against the virus. Rapidly evolving literature now suggests that SARS-CoV-2 targets various cell types of the proximal airways and the alveolar type 2 (AT2) cells of the gas exchange region of the distal lung (Hoffmann et al., 2020; Hou et al., 2020; Ziegler et al., 2020). Infection of AT2 cells drives

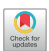

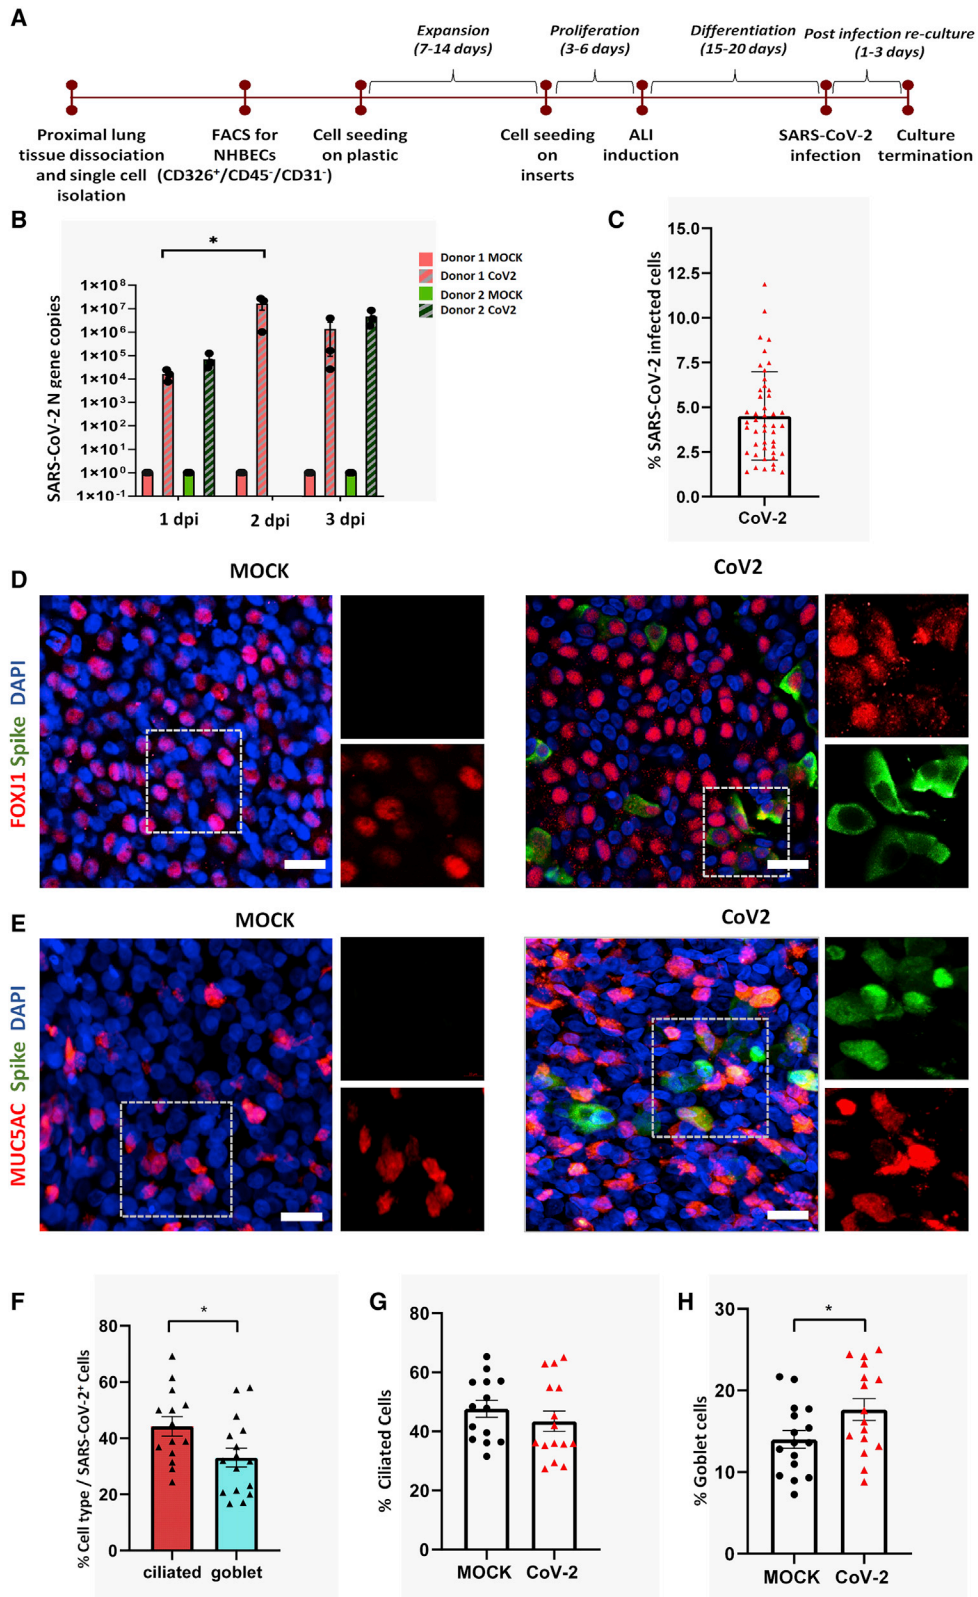

(legend on next page)

acute respiratory distress syndrome (ARDS) in severe cases of COVID-19. We sought to develop culture models of proximal and distal human lung epithelium as a platform to study early response to SARS-CoV-2 infection and for rapid drug discovery in the setting of current and future severe respiratory viral infections.

## RESULTS

### SARS-CoV-2 infects and replicates within human proximal airway epithelial cells

Because the upper respiratory tract represents the most likely initial site of respiratory virus infection, we initially utilized the well-established air-liquid interface (ALI) culture system to study the effect of SARS-CoV-2 infection on proximal airway epithelial cells. Normal human tracheobronchial epithelial cells (NHBEs) isolated from the trachea and upper bronchi were cultured at ALI for 16–20 days to yield a well-differentiated, pseudostratified mucociliary epithelium with approximately  $1 \times 10^5$  cells per insert, of which 47% ( $\pm 10.69\%$ ) were ciliated cells and 14% ( $\pm 5.3\%$ ) were goblet cells. ALI cultures of proximal airway epithelial cells were infected apically with  $1 \times 10^4$  median tissue culture infectious dose (TCID<sub>50</sub>) per well of SARS-CoV-2 and harvested for analysis at 1–3 days postinfection (dpi) (Figure 1A). SARS-CoV-2 readily infected the well-differentiated proximal airway cells as indicated by SARS-CoV-2 Nucleoprotein gene (N gene) copy numbers in infected samples. N gene copy numbers for three wells of ALI cultures from two independent donor samples show that viral genome replication increased at 2 dpi compared with 1 dpi and declined at 3 dpi; however, the later decline was not statistically significant. Viral N gene was undetectable in corresponding mock cultures at all three time points (Figure 1B).

Further analysis of proximal airway ALI cultures at 2 dpi revealed that, on average, 4.5% of total cells were infected by SARS-CoV-2 (Figure 1C). The infection was heterogenous; both ciliated and goblet cells were infected, evidenced by colocalization of SARS-CoV-2 viral capsid “spike” protein with the ciliated cell marker, FOXJ1 (Figure 1D), and the goblet cell marker, MUC5AC (Figure 1E). Ciliated cells were infected at a significantly higher rate than goblet cells. Of the total infected cells, 44.2% were ciliated and 33.1% were goblet cells (Figure 1F). We further assessed whether SARS-CoV-2 infection triggered a change in the proportions of the two cell types. We found no change in the percentage of ciliated cells after SARS-CoV-2 infection (Figure 1G). However, the proportion of MUC5AC-producing goblet cells significantly increased postinfection (Figure 1H).

### SARS-CoV-2 infects and replicates within human AT2 cells

Although infection initiates in the proximal airways, a number of recent studies have shown that in severe cases of COVID-19, ARDS results because of viral infection of AT2 cells in the distal lung epithelium (Hou et al., 2020; Ziegler et al., 2020). As such, physiologically relevant alveolar infection models, including both AT1 and AT2 cells, are needed to study the response of alveolar epithelial cells to SARS-CoV-2.

We previously published the development of the first 3D spheroid culture model of the human alveolar epithelium by co-culturing primary epithelial cells isolated from normal human distal lung tissue in the presence of stromal support cells, embedded in Matrigel (Barkauskas et al., 2013). Alveolar spheroid models were further refined to allow culture of AT2 cells in serum-free, chemically defined conditions (Konda et al., 2020). Our method enabled culture of three-dimensional alveospheres composed of self-renewing AT2 cells that express the well-established AT2 cell markers, HTII-280 and surfactant protein C (SPC) (Figures 2A and 2B). In addition, our cultures also showed the presence of some HTII-280-negative cells, which on further analysis were found to express the AT1 cell marker HTI 56 (Figures 2C and 2D), indicating AT2-to-AT1 cell differentiation capacity. We further assessed expression of the SARS-CoV-2 entry receptor, angiotensin-converting enzyme 2 (ACE2), in our alveosphere cultures and found that ACE2 staining localized to HTII-280<sup>+</sup> AT2 cells (Figures 2E and 2F). This observation is consistent with previous reports of single-cell transcriptomic and immunofluorescence analysis of ACE2 expression in human lung (Hou et al., 2020; Sungnak et al., 2020; Ziegler et al., 2020; Muus et al., 2020).

We went on to utilize our alveosphere system to model SARS-CoV-2 infection of AT2 cells *in vitro*. In brief, isolated HTII-280<sup>+</sup> AT2 cells were cultured in Matrigel for 10–15 days to form 3D alveospheres, which were then enzymatically released from Matrigel, followed by gently “opening” alveospheres to allow viral access to the apical membrane by pipetting three times with a P1000 tip (hereafter referred to as alveolar cultures). We then exposed alveolar cultures to SARS-CoV-2 ( $1 \times 10^4$  TCID<sub>50</sub> per well) or PBS (as MOCK controls) and harvested cells for analysis 1–3 dpi (Figure 2G). Study of viral infection kinetics from 1 to 3 dpi demonstrated that absolute viral N gene copy numbers in cell lysates, which are a measure of intracellular levels of SARS-CoV-2, peaked at 2 dpi. The average N gene copy number increased from  $3.3 \times 10^6$  copies at 1 dpi to  $1.9 \times 10^7$  copies at 2 dpi and declined to  $1.3 \times 10^6$  copies at 3 dpi. Viral N gene copy numbers were below the detection limits in corresponding mock cultures at all three time

#### Figure 1. SARS-CoV-2 infects normal human proximal airway cells

- (A) Workflow for establishment of human proximal airway ALI cultures and their infection with SARS-CoV-2.  
 (B) ALI cultures of proximal airway epithelial cells are susceptible to SARS-CoV-2 infection, indicated by viral N gene copy numbers, which peaked at 2 days postinfection (dpi);  $n = 3$ –6 cultures from 2 independent donors. Red and green colors indicate cultures from separate donors. Data were analyzed using one-way ANOVA with Tukey’s post hoc correction and represented N gene copy numbers for individual cultures  $\pm$  SEM. \* $p < 0.05$ .  
 (C) Percentage of cells from proximal airway ALI cultures infected with SARS-CoV-2 at 2 dpi.  $n = 14$ –15 fields from two biological replicates.  
 (D and E) FOXJ1-positive ciliated cells (red) (D) and MUC5AC-positive goblet cells (red) (E) infected by SARS-CoV-2 (green). Scale bar, 20  $\mu$ m. Image magnification =  $2.3\times$  with a  $20\times$  objective.  
 (F) Percentage of infected cells that are either ciliated cells or goblet cells.  
 (G and H) Change in the percentage of (G) ciliated and (H) goblet cells after SARS-CoV-2 infection. (F–H)  $n = 7$ –8 fields from two biological replicates. Data are presented as mean  $\pm$  SEM (significance is determined by two-tailed t test). \* $p < 0.05$ .

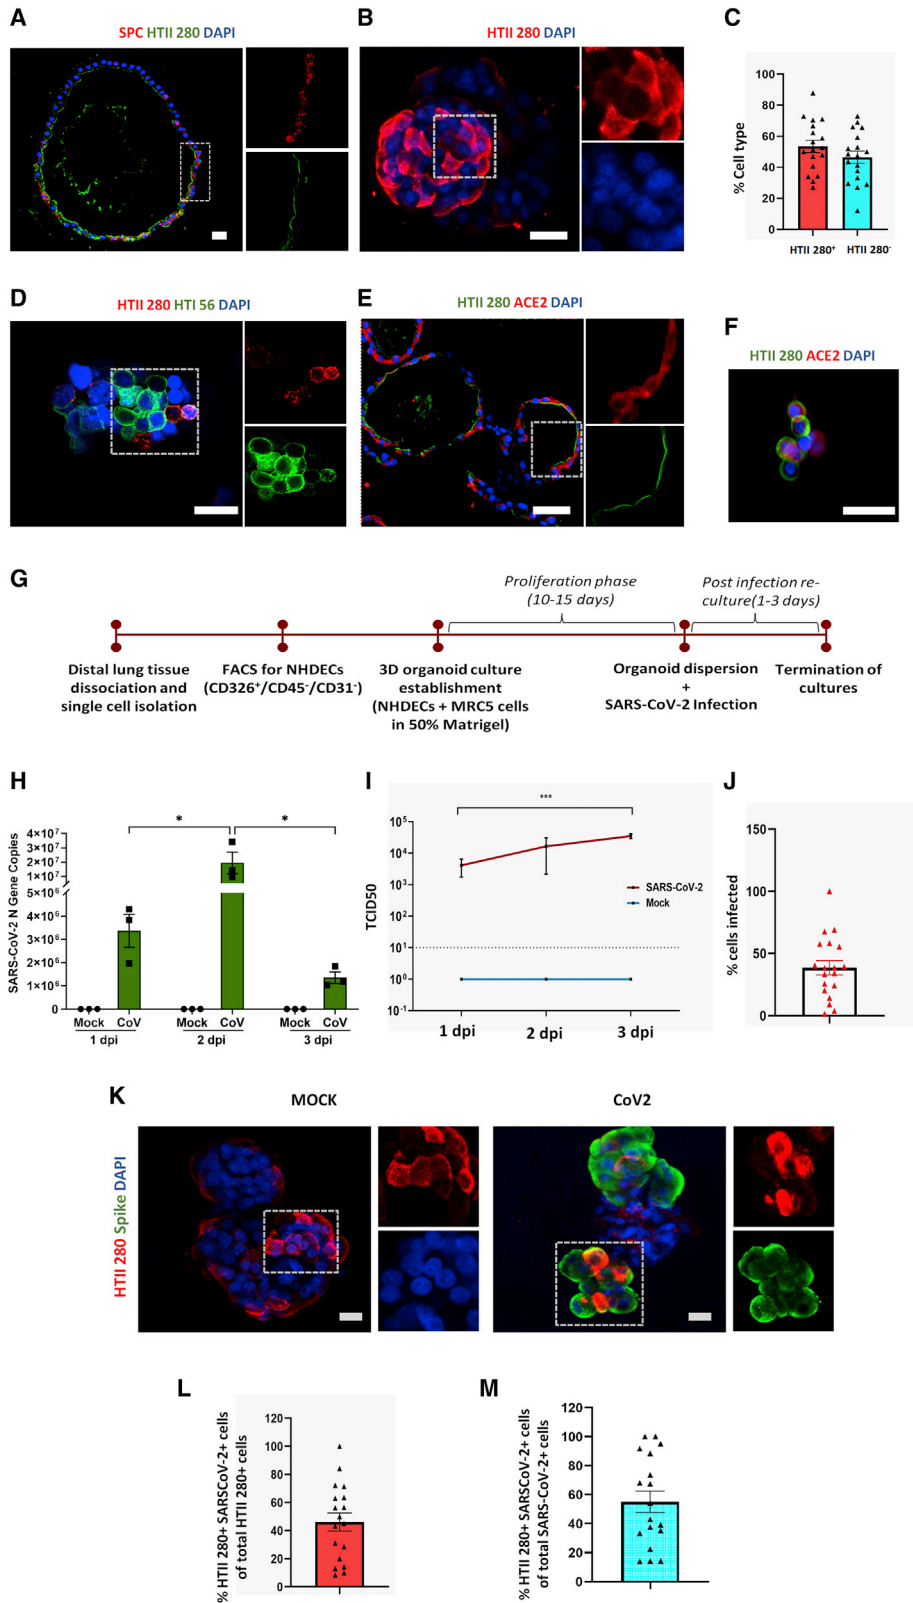

(legend on next page)



points (Figure 2H). In parallel, we also assessed the viral load present in the supernatant medium. This measure represents the amount of free virus released from the infected cells in the supernatant. Viral load increased with each day in culture, peaking at 3 dpi. Viral load in the supernatant was 10-fold higher at 3 dpi compared with 1 dpi, and this difference was statistically significant (Figure 2I). Differences in the absolute viral N gene copy numbers in cell lysates versus viral loads in supernatant medium at 3 dpi likely reflect increased cell death and virus release at the 3-dpi recovery time point (refer to Figure 4 for analysis of cell death). We used immunofluorescence confocal microscopy to verify SARS-CoV-2 infection of epithelial cells in cultures. The efficiency of infection was significantly higher in alveolar cultures compared with proximal airway ALI cultures, with SARS-CoV-2 infecting 38.6% and 4.5% of total cells in distal and proximal cultures, respectively (Figures 2J and 1C). Infection of AT2 cells was confirmed by co-localization of the viral spike protein with HTII-280<sup>+</sup> in 2 dpi cultures (Figure 2K). Of the total HTII-280<sup>+</sup> AT2 cells, 46% were infected by SARS-CoV-2 (Figure 2L). Of the total infected cells, 55.09% were HTII-280<sup>+</sup> AT2 cells (Figure 2M).

### SARS-CoV-2 infection of AT2 cells induces a robust pro-inflammatory response

Having established a model that enables robust infection of AT2 cells by SARS-CoV-2, we further evaluated the utility of this system to study host pathogen responses. Alveolar cultures were infected with SARS-CoV-2, and cells were harvested 2 dpi for transcriptomic analysis via global RNA sequencing (RNA-seq; five samples overall, of which three donor cell preparations were represented for both MOCK- and SARS-CoV-2-infected cultures). Significant changes in transcript profiles were observed between SARS-CoV-2-infected and mock alveolar cultures (Figure 3A). Heatmap (Figure S1A) and volcano plots (Figure 3B) of differentially expressed genes revealed high levels of SARS-CoV-2 viral RNA, such as coding sequences for *Virus\_N*, *virus\_ORF1ab*, *virus\_ORF3a*, and *virus\_ORF7a*, further confirming SARS-CoV-2 genome replication and/or gene transcription in alveolar cultures. Infected cultures showed induction of a number of viral transcripts (Figures S1A and S1B) and proinflammatory transcripts related to viral infections, including type 1 and type 3 interferon-related genes and their downstream targets. The type 1 interferon ligands *IFNA13* and *IFNB1* and type 3 interferon ligands *IFNL1*, *IFNL2*, and *IFNL3* were upregulated in the infected cultures (Figure 3C),

although their cumulative changes were not statistically significant (Figures 3C and S2A). Our alveolar cultures also expressed interferon receptor transcripts irrespective of viral infection status, with *IFNAR2* and *IFNLR1* being significantly upregulated in infected cultures compared with mock-infected controls (Figures 3C and S2B). Donor variability was seen in magnitude of infection between cultures, wherein a direct correlation existed with induction of IFN-related ligand and receptor gene expression. Additionally, multiple downstream interferon signaling genes (ISGs), such as *IF144L*, *IFIT1*, *RSAD2*, *IRF1*, *IRF3*, *IRF7*, *IRF9*, *IF127*, *STAT1*, *JAK1*, *OAS1*, *OAS2*, *ISG15*, and *MX1*, were significantly upregulated in infected cultures (Figures 3C and 3D). These observed increases in gene transcript levels were further validated by qRT-PCR (Figure S2C).

Analysis of differentially regulated canonical pathways revealed that other proinflammatory and viral-sensing pathways, such as nuclear factor  $\kappa$ B (NF- $\kappa$ B) activation, transforming growth factor  $\beta$  (TGF- $\beta$ ) signaling and retinoic acid inducible gene 1 (RIG1)-like receptor signaling, were also upregulated in virus-infected cells (Figure 3E). In contrast, various signaling pathways related to regulation of stem cell activation and fate, such as Notch, Wnt, and BMP signaling, were downregulated (Figures 3B and 3E). However, we did not observe significant changes in expression of the AT2 cell markers, including *SFTPC*, *SFTPA1*, *SFTPA2*, and *SFTPD* (Figures 3B). Furthermore, we did not observe a change in transcript levels for viral entry genes such as *ACE2* and *TMPRSS2* (Figure 3B). Taken together, these data indicate that SARS-CoV-2 infection induces significant upregulation of innate immune response genes in alveolar cells without the participation of recruited immune cells.

### SARS-CoV-2 infection of AT2 triggers cellular apoptosis

Another key pathway that was activated in SARS-CoV2-infected alveolar cultures included the protein ubiquitination pathway. In particular, we saw a significant increase in transcripts for genes whose products act either as chaperons/co-chaperons or sensitize cells to apoptosis. For example, we saw a significant upregulation of *PSMA3*, *DNAJC3*, *DNAB11*, and *TAP1* (Figure 4A), all of which are typically upregulated by cellular stress and interact with key components of apoptotic pathways. Furthermore, we also observed upregulation of apoptosis-related genes *CASP6* and *BCL2* in SARS-CoV-2 infected cultures (Figure 4A). In order to confirm increased cellular apoptosis in SARS-CoV2-infected

#### Figure 2. SARS-CoV-2 infects normal human distal AT2 cells

- (A) Sections of Matrigel-embedded alveospheres showing colocalization of AT2 markers HTII-280 and SPC.  
 (B) Whole-mount staining of alveospheres dispersed from Matrigel for AT2 marker HTII-280. Scale bar = 20  $\mu$ m.  
 (C) Percentage of HTII-280-positive and HTII-280-negative cells in alveospheres in  $n = 3$ –5 fields from three biological replicates (two-tailed t test).  
 (D) Whole-mount alveospheres stained for the AT2 marker HTII-280 and AT1 cell marker HTI 56.  
 (E and F) ACE2 staining in sectioned alveospheres (E) and in AT2 cells (F) dissociated from alveospheres. Scale bar = 20  $\mu$ m.  
 (G) Workflow for establishment of human distal alveolar cultures and their infection with SARS-CoV-2.  
 (H) Absolute N gene copy numbers in SARS-CoV-2-infected cultures peaked at 2 dpi;  $n = 3$  independent cultures. Data were analyzed using two-way ANOVA with Sidak's post hoc correction and represented as N gene copy number for individual cultures  $\pm$  SEM. \* $p < 0.05$ .  
 (I) Viral load in supernatant increased from 1 to 3 dpi. \*\*\* $p < 0.001$ .  
 (J) Percentage of total cells infected ( $n = 3$ ).  
 (K) Infection was assessed at 2 dpi by antibody against SARS-CoV-2 "spike" protein (green) and colocalized with viral AT2 cell marker HTII-280 (red). Scale bar, 20  $\mu$ m.  
 (L) Percentage of HTII-280-positive cells infected by SARS-CoV-2;  $n = 3$ –5 fields from each of three biological replicates.  
 (M) Percentage of total infected cells that are HTII-280-positive AT2 cells;  $n = 3$ –5 fields from each of three biological replicates.

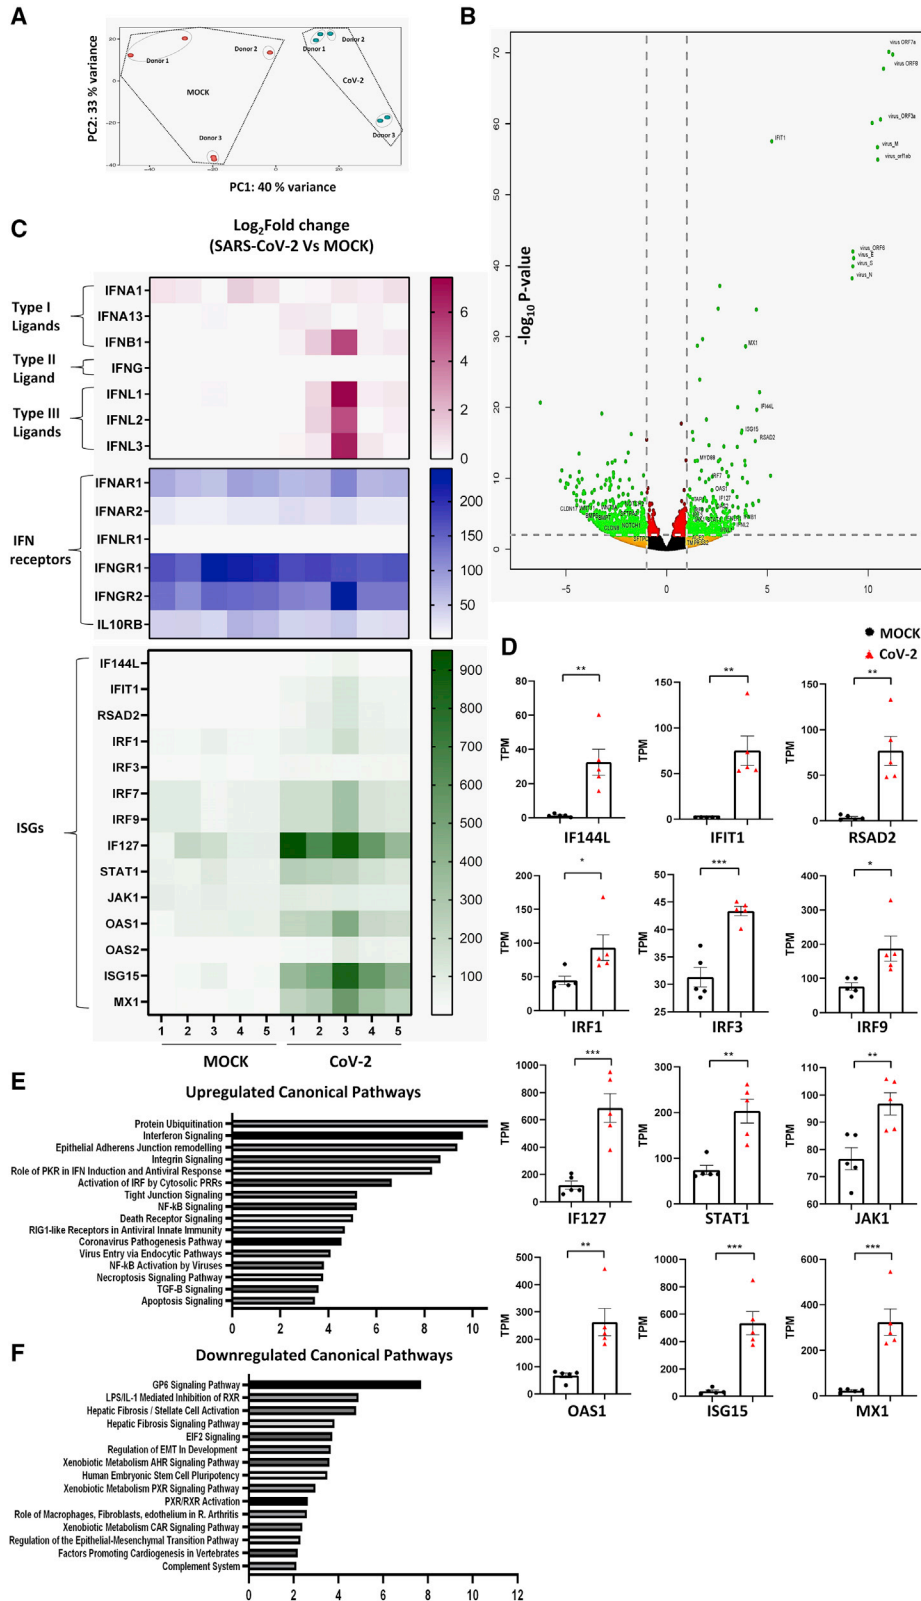

(legend on next page)

cultures, we performed immunofluorescent staining of MOCK and infected cultures for the apoptotic marker, cleaved caspase 3 (CC3). By 3 dpi, infected cultures exhibited significantly enhanced staining for CC3 compared with mock cultures. Interestingly, only a proportion of the apoptotic cells were infected, thus suggesting that SARS-CoV-2 infection led to direct and indirect cytopathic effects on cultured alveolar epithelial cells (Figures 4B and 4C). SARS-CoV-2-induced apoptosis of neighboring uninfected epithelial cells suggests the potential for non-cell-autonomous effects of viral infection on alveolar epithelial integrity. Together, our data suggest that SARS-CoV-2 infection triggers both cell-autonomous and non-cell-autonomous apoptosis that may contribute to alveolar injury. We conclude that cultures of primary alveolar epithelial cells serve as a robust model for studying the effect of SARS-CoV-2 infection on adult distal lung alveolar epithelium.

### Alveolar cultures as a tool to screen therapeutic targets against SARS-CoV-2 infection

Finally, we utilized the distal alveolar cultures to study the effect of a selected panel of drugs against SARS-CoV-2 infection and replication, including the known anti-viral cytokine, IFN $\beta$ 1, and investigational drugs for COVID-19 treatment, remdesivir (Wang et al., 2020; Beigel et al., 2020) and hydroxychloroquine (Pastick et al., 2020; Liu et al., 2020). Treatment of alveolar cultures with IFN $\beta$ 1 leads to a statistically significant, 3.2-log reduction in viral N gene RNA compared with control-infected alveolar cultures (Figure 4D). Hydroxychloroquine led to an overall 2.4-log reduction in viral N gene expression compared with average infection in untreated alveolar cultures (Figure 4D). However, variable effects of hydroxychloroquine were observed on viral replication/gene expression that were donor epithelium dependent (Figure S2). Remdesivir showed the strongest effect on viral replication in alveolar cultures, resulting in a 9-log decrease in viral N gene expression compared with the average infection in untreated cultures (Figure 4D). This effect was consistent irrespective of donor origin of epithelial cells, confirming it as a direct-acting antiviral (DAA) agent targeting viral-specific RNA polymerase (Figure S3). Taken together, our data show that our model of primary human alveolar cultures represents a highly relevant preclinical tool to assess SARS-CoV-2 infection and replication, and serves as a sensitive platform for drug screening and validation.

### DISCUSSION

Our study provides an *in vitro* model to investigate SARS-CoV-2 infection along the proximal-distal axis of the human lung epithelium. Most of the current knowledge of SARS-CoV-2 infection of the lung comes from experiments in non-physiological cell

lines that express ACE2, the receptor for SARS-CoV-2 entry and attachment, such as Vero E6 cells (Chu et al., 2020) or lung cell lines with or without exogenous expression of ACE2 (Hoffmann et al., 2020; Cagno, 2020). However, these models do not replicate the complex physiology of the different polarized lung epithelial cell types. Moreover, commonly used animal models for preclinical drug screening, such as mice, are not natural hosts to SARS-CoV-2 infection. Therefore, there is an urgent need for development of model systems that can mimic the physiology and host response of the human lung and provide a relevant platform for screening potential therapeutic agents that target SARS-CoV-2 infection and replication.

More recently, some studies have utilized primary epithelial cultures of nasal and proximal airway epithelium and organ on chip methods to study SARS-CoV-2 infection of the upper airways, the initial site of entry and infection (Blanco-Melo et al., 2020; Si et al., 2020; Hou et al., 2020; Ravindra et al., 2020). We utilized the well-differentiated ALI culture system to study SARS-CoV-2 infection of proximal airway epithelial cells and found that SARS-CoV-2 predominantly infected ciliated cells in addition to a sub-population of goblet cells. This observation is congruent with previous reports of infection of ciliated cells by SARS-CoV (Jia et al., 2005) and recent reports of infection of ciliated cells by SARS-CoV-2, in *in vitro* cultures of proximal airways (Hou et al., 2020; Lamers et al., 2020), as well as COVID-19 patient biopsies (Hou et al., 2020). A number of studies employing single-cell RNA-seq analysis have described the expression of ACE2 in the respiratory tract (Sungnak et al., 2020; Ziegler et al., 2020; Hou et al., 2020; Qi et al., 2020) and in the nasal passages and large airways, and the highest levels of ACE2 expression have been reported in ciliated cells (Lee et al., 2020; Hou et al., 2020; Ziegler et al., 2020).

Although proximal airways are the initial site of SARS-CoV-2 attachment and infection, it is infection and inflammation of the distal lung that drive the severe and fatal symptoms in COVID-19 among highly susceptible patients. Recent single-cell transcriptome studies have shown that ACE2 is predominantly expressed by AT2 cells (Hou et al., 2020; Qi et al., 2020). AT2 cells are bifunctional cells that serve as facultative progenitors, contributing to epithelial maintenance in addition to fulfilling specialized functions, such as surfactant production (Barkauskas et al., 2013; Rackley and Stripp, 2012). In this study, we describe the development of an *in vitro* model of primary AT2 cells isolated from the adult human lung. In our model, AT2 cells were readily infected by SARS-CoV-2 and demonstrated a significant upregulation of heat shock proteins and chaperon-inducing cellular apoptosis. Moreover, our model demonstrated cell-autonomous and non-cell-autonomous apoptosis induced by viral infection that may contribute to alveolar injury seen in COVID-19.

### Figure 3. Primary human alveolar cultures as a model to study SARS-CoV-2-induced host response

- (A) Principal-component analysis of infected alveolar cultures and MOCK cultures showing variance in the global transcriptome of the two groups (n = 5 from three biological replicates for both MOCK and SARS-CoV-2-infected cultures).  
 (B) Volcano plot of gene expression changes in SARS-CoV-2-infected versus mock cultures defined by p value and >2-fold change.  
 (C) Heatmap of normalized TPM counts for various interferon ligands, receptors, and ISGs.  
 (D) Quantification of normalized TPM counts of various downstream ISGs between MOCK and SARS-CoV-2-infected cultures (n = 5; significance determined by two-tailed t test). \*p < 0.05, \*\*p < 0.01, \*\*\*p < 0.001, \*\*\*\*p < 0.0001.  
 (E and F) The most highly upregulated (E) and downregulated (F) canonical pathways in SARS-CoV-2-infected alveolar cultures.



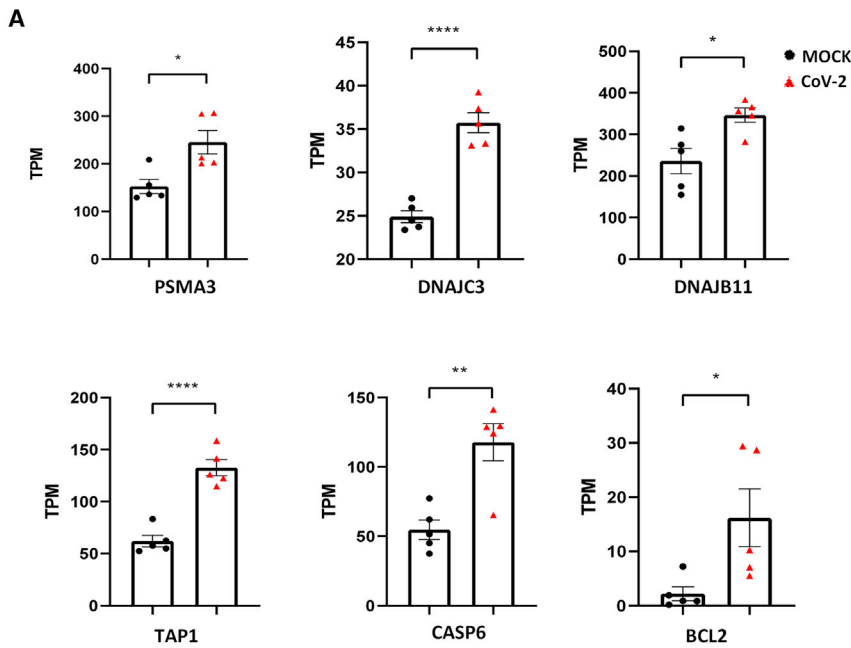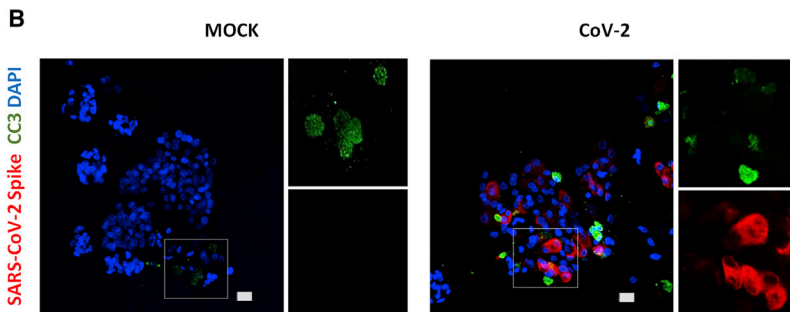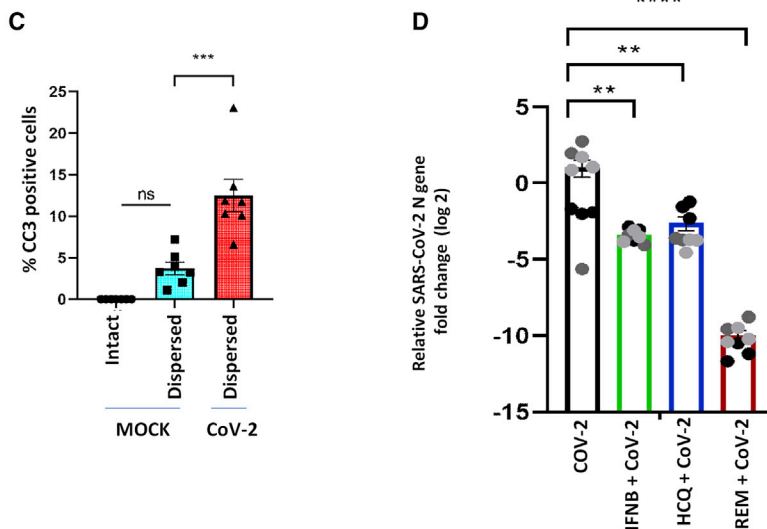

**Figure 4. SARS-CoV-2 infection triggers apoptosis of alveolar cells**

(A) Quantification of normalized TPM counts for apoptosis-related genes between MOCK- and SARS-CoV-2 infected alveolar cultures (n = 5; significance is determined by two-tailed t test). \*p < 0.05, \*\*p < 0.01, \*\*\*p < 0.001, \*\*\*\*p < 0.0001.

(B) Infected AT2 cells (red) also demonstrated signs of cellular apoptosis at 3 dpi, indicated by positive staining for cleaved caspase-3 (green). Scale bar: 20 μm.

(C) Comparison of percentage of cells staining positive for CC3 in intact Matrigel-embedded MOCK alveospheres, alveolar cultures dispersed from Matrigel, and infected cultures dispersed from Matrigel. n = 7 (one-way ANOVA with Tukey's post hoc test). \*p < 0.05, \*\*p < 0.01, \*\*\*p < 0.001, \*\*\*\*p < 0.0001.

(D) Pre-treatment of alveolar cultures with IFNB1, hydroxychloroquine, and remdesivir significantly reduced viral replication. The effect of remdesivir on viral replication was more pronounced than that of IFNB1 or hydroxychloroquine. Data are represented as log<sub>2</sub> fold change for individual cultures ± SEM, normalized to mean infection and analyzed using one-way ANOVA with Tukey's post hoc test. \*\*p = 0.0012 for IFNB1, \*\*p = 0.0044 for HCQ, and \*\*\*\*p < 0.0001 for remdesivir. The three different colors indicate cultures from different biological replicates.

Infection of AT2 cells was accompanied by a cell-intrinsic proinflammatory response and upregulation of the interferon signaling pathway, characterized by upregulation of type 1 and type 3 interferon genes, as well as several ISGs. Recent studies have reported that interferon response is diminished or delayed in severe cases of COVID-19, similar to that seen in severe cases of MERS and SARS-CoV (Blanco-Melo et al., 2020; Channappanavar et al., 2016, 2019). However, we observed a moderate interferon response in our model cells after SARS-CoV-2 infection. A recently published report of SARS-CoV-2 infection of pluripotent stem cell-derived AT2 cells also demonstrated an induction of interferon signaling response similar to our model of primary adult AT2 cells (Huang et al., 2020). The presence of an IFN response in cells derived from normal donors may explain the lack of a severe phenotype in a large proportion of COVID-19 patients. It will be of interest to evaluate the host response to SARS-CoV-2 infection in primary AT2 cells derived from donors with pre-existing lung conditions in the future. It is also important to note that our model system does not consist of an immune cell component. We speculate that the epithelial innate immune response may provide activating signals leading to global activation of the host immune response and provide therapeutic targets for mitigation of uncontrolled lung inflammation and adverse patient outcomes. To better understand host immune response to SARS-CoV-2 infection, co-culture systems of infected AT2 cells with immune cells can be developed in the future.

Further, we tested the efficacy of selected potential therapeutic agents against SARS-CoV-2 infection of AT2 cells and found that viral infection and/or replication was strongly suppressed by the candidate drug, remdesivir. Remdesivir is currently the most promising candidate drug and has been granted emergency use authorization for treatment of hospitalized COVID-19 patients by the US Food and Drug Administration (FDA) (Wang et al., 2020; Beigel et al., 2020). Type 1 interferons are known antiviral agents, and IFNB1 has been suggested to reduce SARS-CoV-2 infection in Vero cells (Clementi et al., 2020; Mantlo et al., 2020) and more recently in patients with severe COVID-19 in an ongoing clinical trial (ClinicalTrials.gov: NCT04385095). Consistent with these findings, we also observed significant suppression of viral infection upon treatment of alveolar cultures with IFNB1. Thus, our platform provides a relevant model to effectively screen and validate drugs targets against SARS-CoV-2.

### Limitations

Our human alveolar model cultures provide a relevant resource to study the host epithelial responses to SARS-CoV-2 infection and a preclinical tool for rapid screening of drugs against COVID-19 and future emergent respiratory pathogens. Recently, two similar studies have reported the use of primary lung alveolar organoids for the study of SARS-CoV-2 infections (Katsura et al., 2020; Youk et al., 2020). Both studies use long-term feeder-free cultures to study the effect of SARS-CoV-2 infection of AT2 cells and demonstrated an induction of interferon signaling response similar to our model. However, our model utilizes a feeder-based system of AT2-derived organoids cultured in the presence of human lung fibroblasts. Moreover, we have also demonstrated differentiation of AT2 cells into AT1 cells in our model. Although our current study focuses on SARS-CoV-2 infection of AT2 cells, the

presence of the different cell types of the distal lung in our model allows for the potential to dissect cell-type-specific responses to SARS-CoV-2 infection.

Currently available models also lack the immune and endothelial components, which are key drivers of adverse outcomes in COVID-19 patients. Perhaps adapting our alveolar model to an organ of the chip system that facilitates co-culture of distal lung epithelial cells with fibroblasts, endothelial cells, and immune cells may help to develop a more cohesive model of the distal lung and help to mitigate this limitation in future studies.

### STAR★METHODS

Detailed methods are provided in the online version of this paper and include the following:

- KEY RESOURCES TABLE
- RESOURCE AVAILABILITY
  - Lead contact
  - Materials availability
  - Data and code availability
- EXPERIMENTAL MODEL AND SUBJECT DETAILS
  - Tissue Procurement
  - Primary cell cultures
  - Virus strain
- METHOD DETAILS
  - Cell isolation
  - Culture and differentiation of proximal airway epithelial cells at air liquid interface
  - Culture of 3D alveospheres
  - SARS-CoV-2 infection of proximal ALI and alveolar type 2 cultures
  - Viral titers
  - Drug validation experiments
  - Immunofluorescence staining
  - Quantitative real time PCR (qRT-PCR)
  - SARS-CoV-2 copy numbers
  - Bulk RNA sequencing
- QUANTIFICATION AND STATISTICAL ANALYSIS

### SUPPLEMENTAL INFORMATION

Supplemental information can be found online at <https://doi.org/10.1016/j.celrep.2021.109055>.

### ACKNOWLEDGMENTS

We would like to thank the Cedars-Sinai Applied Genomics, Computation and Translational Core for their help with performing bulk RNA-seq. The following reagents were obtained through BEI Resources, NIAID, National Institutes of Health (NIH): Polyclonal Anti-SARS Coronavirus (antisera, Guinea Pig), NR-10361; and SARS-Related Coronavirus 2, Isolate USA-WA1/2020, NR-52281. This work was supported by the NIH (5R01HL135163-04, PO1HL108793-08, 3UG3NS105703-03S1, T32HL134637, and 1R01EY032149), the BMS/Celgene IDEAL Consortium, CIRM EDUC2-08383, Parker B. Francis Fellowship Program, UCLA DGSOM and Broad Stem Cell Research Center institutional award (OCRC #20-15), and a California Institute for Regenerative Medicine TRAN Award (TRAN1COVID19-11975).

## AUTHOR CONTRIBUTIONS

A.M., G.G., and B.K. performed experiments. A.M. and B.R.S. designed studies and wrote the manuscript. G.G., S.B., J.M.V., C.K., C.S., A.P., P.P., J.S.d.A., and C.G.-d.-A. prepared samples and provided reagents. C.Y. and A.M. analyzed RNA-seq data. A.M., C.F.K., B.G., B.R.S., and V.A. interpreted results. J.K.K. and D.A.P. provided IFN $\beta$ 1 and guidance for drug validation experiments. B.R.S. and V.A. supervised.

## DECLARATION OF INTERESTS

The authors declare no competing interests.

Received: August 5, 2020

Revised: November 9, 2020

Accepted: April 8, 2021

Published: May 4, 2021

## REFERENCES

- Barkauskas, C.E., Crouce, M.J., Rackley, C.R., Bowie, E.J., Keene, D.R., Stripp, B.R., Randell, S.H., Noble, P.W., and Hogan, B.L. (2013). Type 2 alveolar cells are stem cells in adult lung. *J. Clin. Invest.* **123**, 3025–3036.
- Beigel, J.H., Tomashek, K.M., Dodd, L.E., Mehta, A.K., Zingman, B.S., Kalil, A.C., Hohmann, E., Chu, H.Y., Luetkemeyer, A., Kline, S., et al. (2020). Remdesivir for the Treatment of Covid-19—Preliminary Report. *N. Engl. J. Med.* **383**, 1813–1826.
- Blanco-Melo, D., Nilsson-Payant, B.E., Liu, W.C., Uhl, S., Hoagland, D., Møller, R., Jordan, T.X., Oishi, K., Panis, M., Sachs, D., et al. (2020). Imbalanced Host Response to SARS-CoV-2 Drives Development of COVID-19. *Cell* **181**, 1036–1045.e9.
- Cagno, V. (2020). SARS-CoV-2 cellular tropism. *Lancet Microbe* **1**, e2–e3.
- Carraro, G., Mulay, A., Yao, C., Mizuno, T., Konda, B., Petrov, M., Lafkas, D., Arron, J.R., Hogaboam, C.M., Chen, P., et al. (2020). Single-Cell Reconstruction of Human Basal Cell Diversity in Normal and Idiopathic Pulmonary Fibrosis Lung. *Am. J. Respir. Crit. Care Med.* **202**, 1540–1550.
- Channappanavar, R., Fehr, A.R., Vijay, R., Mack, M., Zhao, J., Meyerholz, D.K., and Perlman, S. (2016). Dysregulated Type I Interferon and Inflammatory Monocyte-Macrophage Responses Cause Lethal Pneumonia in SARS-CoV-Infected Mice. *Cell Host Microbe* **19**, 181–193.
- Channappanavar, R., Fehr, A.R., Zheng, J., Wohlford-Lenane, C., Abrahante, J.E., Mack, M., Sompallae, R., McCray, P.B., Jr., Meyerholz, D.K., and Perlman, S. (2019). IFN-I response timing relative to virus replication determines MERS coronavirus infection outcomes. *J. Clin. Invest.* **129**, 3625–3639.
- Chu, H., Chan, J.F., Yuen, T.T., Shuai, H., Yuan, S., Wang, Y., Hu, B., Yip, C.C., Tsang, J.O., Huang, X., et al. (2020). Comparative tropism, replication kinetics, and cell damage profiling of SARS-CoV-2 and SARS-CoV with implications for clinical manifestations, transmissibility, and laboratory studies of COVID-19: an observational study. *Lancet Microbe* **1**, e14–e23.
- Clementi, N., Ferrarese, R., Crisculo, E., Diotti, R.A., Castelli, M., Scagnolari, C., Burioni, R., Antonelli, G., Clementi, M., and Mancini, N. (2020). Interferon- $\beta$ -1a Inhibition of Severe Acute Respiratory Syndrome-Coronavirus 2 In Vitro When Administered After Virus Infection. *J. Infect. Dis.* **222**, 722–725.
- Cui, J., Li, F., and Shi, Z.L. (2019). Origin and evolution of pathogenic coronaviruses. *Nat. Rev. Microbiol.* **17**, 181–192.
- Dobin, A., Davis, C.A., Schlesinger, F., Drenkow, J., Zaleski, C., Jha, S., Batut, P., Chaisson, M., and Gingeras, T.R. (2013). STAR: ultrafast universal RNA-seq aligner. *Bioinformatics* **29**, 15–21.
- Gauger, P.C., and Vincent, A.L. (2014). Serum virus neutralization assay for detection and quantitation of serum-neutralizing antibodies to influenza A virus in swine. *Methods Mol. Biol.* **1167**, 313–324.
- Hoffmann, M., Kleine-Weber, H., Schroeder, S., Krüger, N., Herrler, T., Erichsen, S., Schiergens, T.S., Herrler, G., Wu, N.H., Nitsche, A., et al. (2020). SARS-CoV-2 Cell Entry Depends on ACE2 and TMPRSS2 and Is Blocked by a Clinically Proven Protease Inhibitor. *Cell* **181**, 271–280.e8.
- Hou, Y.J., Okuda, K., Edwards, C.E., Martinez, D.R., Asakura, T., Dinnon, K.H., 3rd, Kato, T., Lee, R.E., Yount, B.L., Mascenik, T.M., et al. (2020). SARS-CoV-2 Reverse Genetics Reveals a Variable Infection Gradient in the Respiratory Tract. *Cell* **182**, 429–446.e14.
- Huang, J., Hume, A.J., Abo, K.M., Werder, R.B., Villacorta-Martin, C., Alysan-dratos, K.D., Beermann, M.L., Simone-Roach, C., Lindstrom-Vautrin, J., Olejnik, J., et al. (2020). SARS-CoV-2 Infection of Pluripotent Stem Cell-Derived Human Lung Alveolar Type 2 Cells Elicits a Rapid Epithelial-Intrinsic Inflammatory Response. *Cell Stem Cell* **27**, 962–973.e7.
- Jia, H.P., Look, D.C., Shi, L., Hickey, M., Pewe, L., Netland, J., Farzan, M., Wohlford-Lenane, C., Perlman, S., and McCray, P.B., Jr. (2005). ACE2 receptor expression and severe acute respiratory syndrome coronavirus infection depend on differentiation of human airway epithelia. *J. Virol.* **79**, 14614–14621.
- Katsura, H., Sontake, V., Tata, A., Kobayashi, Y., Edwards, C.E., Heaton, B.E., Konkimalla, A., Asakura, T., Mikami, Y., Fritch, E.J., et al. (2020). Human Lung Stem Cell-Based Alveolospheres Provide Insights into SARS-CoV-2-Mediated Interferon Responses and Pneumocyte Dysfunction. *Cell Stem Cell* **27**, 890–904.e8.
- Konda, B., Mulay, A., Yao, C., Beil, S., Israely, E., and Stripp, B.R. (2020). Isolation and Enrichment of Human Lung Epithelial Progenitor Cells for Organoid Culture. *J. Vis. Exp.* **2020**, 161.
- Lamers, M.M., Beumer, J., van der Vaart, J., Knoops, K., Puschhof, J., Breugem, T.I., Ravelli, R.B.G., Paul van Schayck, J., Mykytyn, A.Z., Duimel, H.Q., et al. (2020). SARS-CoV-2 productively infects human gut enterocytes. *Science* **369**, 50–54.
- Lee, I.T., Nakayama, T., Wu, C.-T., Goltsev, Y., Jiang, S., Gall, P.A., Liao, C.-K., Shih, L.-C., Schürch, C.M., McIlwain, D.R., et al. (2020). Robust ACE2 protein expression localizes to the motile cilia of the respiratory tract epithelia and is not increased by ACE inhibitors or angiotensin receptor blockers. *medRxiv*. <https://doi.org/10.1101/2020.05.08.20092866>.
- Li, B., and Dewey, C.N. (2011). RSEM: accurate transcript quantification from RNA-Seq data with or without a reference genome. *BMC Bioinformatics* **12**, 323.
- Liu, J., Cao, R., Xu, M., Wang, X., Zhang, H., Hu, H., Li, Y., Hu, Z., Zhong, W., and Wang, M. (2020). Hydroxychloroquine, a less toxic derivative of chloroquine, is effective in inhibiting SARS-CoV-2 infection in vitro. *Cell Discov.* **6**, 16.
- Love, M.I., Huber, W., and Anders, S. (2014). Moderated estimation of fold change and dispersion for RNA-seq data with DESeq2. *Genome Biol.* **15**, 550.
- Mantlo, E., Bukreyeva, N., Maruyama, J., Paessler, S., and Huang, C. (2020). Antiviral activities of type I interferons to SARS-CoV-2 infection. *Antiviral Res.* **179**, 104811.
- Muus, C., Luecken, M.D., Eraslan, G., Waghay, A., Heimberg, G., Sikkema, L., Kobayashi, Y., Vaishnav, E.D., Subramanian, A., Smilie, C., Jagadeesh, K., et al. (2020). Integrated analyses of single-cell atlases reveal age, gender, and smoking status associations with cell type-specific expression of mediators of SARS-CoV-2 viral entry and highlights inflammatory programs in putative target cells. *bioRxiv*. <https://doi.org/10.1101/2020.04.19.049254>.
- Pastick, K.A., Okafor, E.C., Wang, F., Lofgren, S.M., Skipper, C.P., Nicol, M.R., Pullen, M.F., Rajasingham, R., McDonald, E.G., Lee, T.C., et al. (2020). Review: Hydroxychloroquine and Chloroquine for Treatment of SARS-CoV-2 (COVID-19). *Open Forum Infect. Dis.* **7**, ofaa130.
- Qi, F., Qian, S., Zhang, S., and Zhang, Z. (2020). Single cell RNA sequencing of 13 human tissues identify cell types and receptors of human coronaviruses. *Biochem. Biophys. Res. Commun.* **526**, 135–140.
- Rackley, C.R., and Stripp, B.R. (2012). Building and maintaining the epithelium of the lung. *J. Clin. Invest.* **122**, 2724–2730.
- Ravindra, N.G., Alfajaro, M.M., Gasque, V., Habet, V., Wei, J., Filler, R.B., Huston, N.C., Wan, H., Szigeti-Buck, K., Wang, B., et al. (2020). Single-cell longitudinal analysis of SARS-CoV-2 infection in human bronchial epithelial cells. *bioRxiv*. <https://doi.org/10.1101/2020.05.06.081695>.

Si, L., Bai, H., Rodas, M., Cao, W., Oh, C.Y., Jiang, A., Nurani, A., Zhu, D.Y., Goyal, G., Gilpin, S.E., et al. (2020). Human organs-on-chips as tools for repurposing approved drugs as potential influenza and COVID19 therapeutics in viral pandemics. *bioRxiv*. <https://doi.org/10.1101/2020.04.13.039917>.

Sungnak, W., Huang, N., Bécavin, C., Berg, M., Queen, R., Litvinukova, M., Talavera-López, C., Maatz, H., Reichart, D., Sampaziotis, F., et al.; HCA Lung Biological Network (2020). SARS-CoV-2 entry factors are highly expressed in nasal epithelial cells together with innate immune genes. *Nat. Med.* 26, 681–687.

Tay, M.Z., Poh, C.M., Rénia, L., MacAry, P.A., and Ng, L.F.P. (2020). The trinity of COVID-19: immunity, inflammation and intervention. *Nat. Rev. Immunol.* 20, 363–374.

Vijaykrishna, D., Poon, L.L., Zhu, H.C., Ma, S.K., Li, O.T., Cheung, C.L., Smith, G.J., Peiris, J.S., and Guan, Y. (2010). Reassortment of pandemic H1N1/2009 influenza A virus in swine. *Science* 328, 1529.

Wang, Y., Zhang, D., Du, G., Du, R., Zhao, J., Jin, Y., Fu, S., Gao, L., Cheng, Z., Lu, Q., et al. (2020). Remdesivir in adults with severe COVID-19: a randomised, double-blind, placebo-controlled, multicentre trial. *Lancet* 395, 1569–1578.

Youk, J., Kim, T., Evans, K.V., Jeong, Y.I., Hur, Y., Hong, S.P., Kim, J.H., Yi, K., Kim, S.Y., Na, K.J., et al. (2020). Three-Dimensional Human Alveolar Stem Cell Culture Models Reveal Infection Response to SARS-CoV-2. *Cell Stem Cell* 27, 905–919.e10.

Zhou, P., Yang, X.L., Wang, X.G., Hu, B., Zhang, L., Zhang, W., Si, H.R., Zhu, Y., Li, B., Huang, C.L., et al. (2020). A pneumonia outbreak associated with a new coronavirus of probable bat origin. *Nature* 579, 270–273.

Ziegler, C.G.K., Allon, S.J., Nyquist, S.K., Mbanjo, I.M., Miao, V.N., Tzouanas, C.N., Cao, Y., Yousif, A.S., Bals, J., Hauser, B.M., et al.; HCA Lung Biological Network. Electronic address: lung-network@humancellatlas.org; HCA Lung Biological Network (2020). SARS-CoV-2 Receptor ACE2 Is an Interferon-Stimulated Gene in Human Airway Epithelial Cells and Is Detected in Specific Cell Subsets across Tissues. *Cell* 181, 1016–1035.e19.

## STAR★METHODS

### KEY RESOURCES TABLE

| REAGENT or RESOURCE                                    | SOURCE                                                         | IDENTIFIER                                                          |
|--------------------------------------------------------|----------------------------------------------------------------|---------------------------------------------------------------------|
| <b>Antibodies</b>                                      |                                                                |                                                                     |
| Mouse anti- FOXJ1                                      | Thermo Fisher Scientific                                       | Cat # 14-9965-82; RRID: AB_1548835                                  |
| Mouse anti- Mucin 5AC, 45M1                            | Thermo Fisher Scientific                                       | Cat # MA5-12178; RRID: AB_10978001                                  |
| Mouse anti- HTII-280                                   | Terrace Biotech                                                | Cat # TB-27AHT2-280; RRID: AB_2832931                               |
| Mouse anti- HTI-56                                     | Terrace Biotech                                                | Cat # TB-29AHT1-56; RRID: AB_2847898                                |
| Guinea Pig anti- SARS-CoV-2 spike (S) protein          | BEI Resources                                                  | NR-10361                                                            |
| Rabbit anti- Cleaved caspase-3                         | Cell Signaling Technology                                      | Cat # 9661; RRID: AB_2341188                                        |
| Mouse anti- CD31                                       | BioLegend                                                      | Cat # 303104; RRID: AB_314330                                       |
| Mouse anti- CD45                                       | BioLegend                                                      | Cat # 304054; RRID: AB_2564154                                      |
| Mouse anti- CD326                                      | BioLegend                                                      | Cat # 324208; RRID: AB_756082                                       |
| <b>Bacterial and virus strains</b>                     |                                                                |                                                                     |
| SARS-CoV-2, isolate USA-WA1/2020<br>GenBank: MT020880) | BEI Resources                                                  | (NR-52281)                                                          |
| <b>Biological samples</b>                              |                                                                |                                                                     |
| Normal Lung Tissue                                     | International Institute for the Advancement of Medicine (IIAM) | N/A                                                                 |
| <b>Chemicals, peptides, and recombinant proteins</b>   |                                                                |                                                                     |
| Hydroxychloroquine                                     | Selleck Chemicals                                              | Cat # S4430                                                         |
| Remdesivir                                             | Selleck Chemicals                                              | Cat # S8932                                                         |
| IFNB1 stock                                            | Provided by Dr Jay Kolls                                       | N/A                                                                 |
| Liberase                                               | Millipore Sigma                                                | Cat # 5401127001                                                    |
| <b>Critical commercial assays</b>                      |                                                                |                                                                     |
| CD31 MicroBead Kit, human                              | Miltenyi Biotec                                                | Cat # 130-091-935                                                   |
| CD45 MicroBead Kit, human                              | Miltenyi Biotec 130-                                           | Cat # 130-045-801                                                   |
| <b>Deposited data</b>                                  |                                                                |                                                                     |
| Raw and analyzed data                                  | This paper                                                     | GEO: GSE160435                                                      |
| <b>Experimental models: cell lines</b>                 |                                                                |                                                                     |
| MRC5 human lung fibroblast cells                       | ATCC                                                           | CCL-171                                                             |
| <b>Oligonucleotides</b>                                |                                                                |                                                                     |
| Primers for SARS-CoV-2 N1 gene (See Table S1)          | CDC's resources for research labs                              | N/A                                                                 |
| Primers for IFN Stimulated genes (See Table S1)        | This paper                                                     | N/A                                                                 |
| <b>Software and algorithms</b>                         |                                                                |                                                                     |
| ImageJ                                                 | N/A                                                            | <a href="https://imagej.nih.gov/ij/">https://imagej.nih.gov/ij/</a> |
| GraphPad Prism 8                                       | GraphPad                                                       | RRID:SCR_002798                                                     |
| <b>Other</b>                                           |                                                                |                                                                     |
| Pneumacult Ex media                                    | Stem Cell Technologies                                         | Cat #05008                                                          |
| Pneumacult ALI media                                   | Stem Cell Technologies                                         | Cat # 05001                                                         |

### RESOURCE AVAILABILITY

#### Lead contact

Further information and requests for resources and reagents should be directed to and will be fulfilled by the Lead Contact, Barry Stripp ([barry.stripp@cshs.org](mailto:barry.stripp@cshs.org)).



### Materials availability

AT2 cell cultures or primary proximal and distal epithelial cells will be made available upon installment of a material transfer agreement (MTA).

### Data and code availability

Original gene expression data from this study have been deposited to Gene Expression Omnibus with accession number *GEO: GSE160435*.

## EXPERIMENTAL MODEL AND SUBJECT DETAILS

### Tissue Procurement

Human lung tissue was obtained from 'normal' (without prior history of lung disease) deceased organ donors in compliance with consent procedures developed by International Institute for the Advancement of Medicine (IIAM) and approved by the Internal Review Board at Cedar-Sinai Medical Center.

Donor 1: 52-year-old Male  
Donor 2: 37-year-old Male  
Donor 3: 60-year-old Female  
Donor 4: 78-year-old Female  
Donor 5: 72-year-old Female  
Donor 6: 2-year-old Male  
Donor 7: 51-year-old Male

Donors 1 and 2 were used for SARS-CoV-2 infection of proximal airway cultures whereas donors 3-7 were used for SARS-CoV-2 infection of alveolar cultures. Donors 5,6 and 7 were used for RNA seq studies.

### Primary cell cultures

Human proximal airway cells (tracheo-bronchial epithelial cells) and distal lung small airway epithelial cells were isolated from freshly excised normal human lungs obtained from transplant donors with lungs unsuitable for transplant, procured from IIAM under IRB-approved protocol. Proximal cells expanded in Pneumacult Ex medium and differentiated in Pneumacult ALI medium as described in methods details. Distal small airway epithelial cells were cultured as 3D alveospheres in Pneumacult ALI medium as described in method details.

### Virus strain

SARS-CoV-2, isolate USA-WA1/2020 (NR-52281), was sourced from the Biodefense and Emerging Infections (BEI) Resources of the National Institute of Allergy and Infectious Diseases (NIAID, GenBank: MT020880) All studies involving SARS-CoV-2 infection of proximal airway and AT2 cells were conducted in the UCLA BSL3 High-Containment Facility. SARS-CoV-2 was amplified once in Vero-E6 cells and viral stocks were stored at  $-80^{\circ}\text{C}$ . Vero-E6 cells were cultured in Eagle's minimal essential medium (MEM) (Corning) supplemented with 10% fetal bovine serum (Corning), penicillin-streptomycin, L-glutamine (GIBCO) and HEPES (GIBCO). Specifics of viral culture medium are described in method details.

## METHOD DETAILS

### Cell isolation

Human lung tissue was processed as described previously (Konda et al., 2020; Carraro et al., 2020) with the following modifications. For isolation of proximal airway cells, trachea and the first 2-3 generation of bronchi were slit vertically and enzymatically digested with Liberase (50  $\mu\text{g}/\text{mL}$ ) and DNase 1 (25  $\mu\text{g}/\text{mL}$ ) incubated at  $37^{\circ}\text{C}$  with mechanical agitation for 20 minutes, followed by gentle scraping of epithelial cells from the basement membrane. The remaining tissue was finely minced and further digested for 40 minutes at  $37^{\circ}\text{C}$ . For distal alveolar cell isolation, small airways of 2mm diameter or less and surrounding parenchymal tissue was minced finely and enzymatically digested for 40-60 minutes as described before. Total proximal or distal dissociated cells were passed through a series of cell strainers of decreasing pore sizes from 500  $\mu\text{m}$  to 40  $\mu\text{m}$  under vacuum pressure and depleted of immune and endothelial cells by magnetic associated cell sorting (MACS) in accordance to the manufacturing protocol (Miltenyi Biotec). Viable epithelial cells were further enriched by fluorescence associated cell sorting (FACS) using DAPI (Thermo Fisher Scientific) and antibodies against EPCAM (CD326), CD45 and CD31 (Biolegend) on a BD Influx cell sorter (Becton Dickinson).

### Culture and differentiation of proximal airway epithelial cells at air liquid interface

FACS enriched proximal airway epithelial cells were expanded in T25 or T75 flasks coated with bovine type I collagen (Purecol, Advanced biomatrix) in Pneumacult Ex media (STEMCELL Technologies), supplemented with 1X Penicillin-Streptomycin-Neomycin

(PSN) Antibiotic Mixture (Thermo Fisher Scientific) and 10 $\mu$ M Rho kinase inhibitor, Y-27632 (STEMCELL technologies). Upon confluence cells were dissociated using 0.05% Trypsin-EDTA (Thermo Fisher Scientific) and seeded onto collagen coated 0.4  $\mu$ m pore size transparent cell culture inserts in a 24-well supported format (Corning) at a density of 7.5  $\times$  10<sup>4</sup> cells per insert. Cells were initially cultured submerged with 300  $\mu$ L of Pneumacult Ex media in the apical chamber and 700  $\mu$ L in the basement chamber for 3-5 days. Upon confluence, cells were cultured at air liquid interface in 700  $\mu$ L Pneumacult ALI media (STEMCELL Technologies) supplemented with 1X PSN and media was changed every 48 hr. Cultures were maintained at 37°C in a humidified incubator (5% CO<sub>2</sub>) and used for SARS-CoV-2 infection after 16-20 days of differentiation.

### Culture of 3D alveospheres

Five thousand FACS enriched distal lung epithelial cells were mixed with 7.5  $\times$  10<sup>4</sup> MRC5 human lung fibroblast cells (ATCC CCL-171) and resuspended in a 50:50 (v/v) ratio of ice cold Matrigel (Corning) and Pneumacult ALI medium. 100 $\mu$ L of the suspension was seeded onto the apical surface of a 0.4  $\mu$ m pore-size cell culture insert in a 24 well supported format. After polymerization of Matrigel, 700  $\mu$ L of Pneumacult ALI medium was added to the basement membrane. Media was supplemented with 50  $\mu$ g per ml of Genta-mycin (Sigma Aldrich) for the first 24 hr. and 10 $\mu$ M Rho kinase inhibitor for the first 48 hr. 2  $\mu$ M of the Wnt pathway activator, CHIR-99021 (STEMCELL technologies) was added to the media at 48hrs and maintained for the entire duration of culture. Media was changed every 48 hr. Cultures were maintained at 37°C in a humidified incubator (5% CO<sub>2</sub>) and used for SARS-CoV-2 infection after 15-20 days.

### SARS-CoV-2 infection of proximal ALI and alveolar type 2 cultures

All studies involving SARS-CoV-2 infection of proximal airway and AT2 cells were conducted in the UCLA BSL3 High-Containment Facility. SARS-CoV-2, isolate USA-WA1/2020, was sourced from the Biodefense and Emerging Infections (BEI) Resources of the National Institute of Allergy and Infectious Diseases (NIAID). SARS-CoV-2 was amplified once in Vero-E6 cells and viral stocks were stored at –80°C. Vero-E6 cells were cultured in Eagle’s minimal essential medium (MEM) (Corning) supplemented with 10% fetal bovine serum (Corning), penicillin-streptomycin (100 units/ml, GIBCO), 2 mM L-glutamine (GIBCO) and 10 mM HEPES (GIBCO). Cells were incubated at 37°C in a humidified incubator (5% CO<sub>2</sub>).

Prior to infection of alveolar cultures, Matrigel was dissolved by adding 500  $\mu$ L of Dispase (500  $\mu$ g/ml, GIBCO) to the apical and basement chambers of inserts and incubating for 1 hour at 37°C. Alveospheres were harvested, washed, gently dispersed with a P1000 tip by pipetting up and down 3 times such that the alveospheres were ‘popped open’, exposing the apical surface of the cells. Hereafter the cultures were referred to as alveolar cultures. SARS-CoV-2 inoculum (1 $\times$ 10<sup>4</sup> TCID<sub>50</sub> per well) was added to the alveolar cultures in a 2 mL conical tube and incubated for 2 hours at 37°C (5% CO<sub>2</sub>). Every 15 minutes, tubes were gently mixed to facilitate virus adsorption on to the cells. Subsequently, inoculum was replaced with fresh Pneumacult ALI medium and alveolar cultures were transferred to the apical chamber of the insert in 100  $\mu$ L volume with 500  $\mu$ L of the medium in the basement chamber. Cultures were incubated at 37°C (5% CO<sub>2</sub>) and harvested at indicated time points for sample collection.

For infection of proximal airway ALI cultures, 100  $\mu$ L of SARS-CoV-2 virus inoculum (1 $\times$ 10<sup>4</sup> TCID<sub>50</sub> per well) was added on to the apical chamber of inserts. Cells were incubated at 37°C (5% CO<sub>2</sub>) for 2 hours for virus adsorption. Subsequently, the cells were washed and fresh Pneumacult ALI media (500  $\mu$ L in the base chamber) was added. Cells were incubated at 37°C (5% CO<sub>2</sub>) and harvested for analysis at indicated time points for sample collection.

### Viral titers

Proximal ALI and alveolar cultures were infected with 1 $\times$ 10<sup>4</sup> TCID<sub>50</sub> per well of SARS-CoV-2 as described before. For AT2 cells, at each time point (1,2 and 3dpi), media from the basal chamber from mock and SARS-CoV-2 infected wells were collected and stored at –80°C. For ALI cultures, apical washes at each time point were collected and stored at 80°C. Viral production by infected cultures was measured by quantifying TCID<sub>50</sub> (Median Tissue Culture Infectious Dose) as described (Gauger and Vincent, 2014). Briefly, Vero-E6 cells were plated in 96-well plates at a density of 5  $\times$  10<sup>3</sup> cells/well. The following day, samples collected from the cultures at the different time points were subjected to 10-fold serial dilutions (10<sup>–1</sup> to 10<sup>–6</sup>) and inoculated onto Vero-E6 cells. The cells were incubated at 37°C with 5% CO<sub>2</sub>. After 72 hours, each inoculated well was examined for presence or absence of viral CPE and percent infected dilutions immediately above and immediately below 50% were determined. TCID<sub>50</sub> was calculated based on the method of Reed and Muench.

### Drug validation experiments

Hydroxychloroquine (Selleck Chemicals Cat. No. S4430) and Remdesivir (Selleck Chemicals Cat. No. S8932) were dissolved in DMSO to a stock concentration of 10 mM. IFNB1 stock of 10<sup>6</sup> units/ml was provided by Dr. Jay Kolls. To test the efficacy of the drugs against SARS-CoV-2 infection/replication in AT2 cells, cultures were suspended in media containing treated with 10  $\mu$ M of Hydroxychloroquine or Remdesivir, or 100 units/ml of IFNB1 3 hours prior to SARS-CoV-2 infection. Viral infections were performed as described previously. Drugs were maintained in the media for the duration of culture post infection. alveolar cultures without drug treatment in the presence or absence (mock) of viral infections were included as controls.

### Immunofluorescence staining

1-3 days after SARS-CoV-2 infection, cultures were fixed by adding 500 $\mu$ L of 4% paraformaldehyde in phosphate-buffered saline (PBS) for 20 minutes. Fixed samples were permeabilized and blocked for 1 hour in a 'blocking buffer' containing PBS, 2% bovine serum albumin, 5% goat serum, 5% donkey serum and 0.3% Triton X-100. Primary antibodies diluted in the blocking buffer were applied to samples and incubated overnight at 4°C. The following primary antibodies were used: FOXJ1 (1:300, Thermo Fisher Scientific, Cat. No. 14-9965-82); Mucin 5AC, 45M1 (1:500, Thermo Fisher Scientific, Cat. No. MA5-12178); HTII-280 (1:500, Terrace Biotech, Cat. No. TB-27AHT2-280); HTI-56 (1:100, Terrace Biotech, Cat. No. TB-29AHT1-56) SARS-CoV-2 spike (S) protein (1:100, BEI Resources Polyclonal Anti-SARS Coronavirus (antiserum, Guinea Pig), NR-10361); Cleaved caspase-3 (1:200, Cell Signaling Technology Cat. No. 9661). Samples were washed 3 times for 5 minutes each with PBS. Appropriate secondary antibodies conjugated to fluorophores (Thermo Fisher Scientific) were applied to the samples for 1 hour at room temperature. Samples were washed 3 times for 5 minutes each with PBS followed by addition of DAPI (1:5000) for 5 minutes. Insert membranes were carefully detached from their transwell support with a fine scalpel, and transferred to a glass microscopic slide. Samples were mounted using Fluoromount G (Thermo Fisher Scientific), imaged on a Zeiss LSM 780 Confocal Microscope and images were processed using Zen Blue software (Zeiss).

### Quantitative real time PCR (qRT-PCR)

Total RNA was extracted from mock and SARS-CoV-2 infected proximal airway ALI and alveolar cultures lysed in Trizol (Thermo Fisher Scientific) using the chloroform-iso-propanol-ethanol method. 500ng of RNA was reversed transcribed into cDNA in a 20  $\mu$ L reaction volume using iScript cDNA synthesis kit (Biorad) in accordance to manufacturer's guidelines. qRT-PCR was performed on 10ng of CDNA per reaction in triplicates for each sample using SYBR green master mix (Thermo Fisher Scientific) on a 7500 Fast Real Time PCR system (Applied biosystems). Primers sequences for detection of SARS-CoV-2 N gene were obtained from the Center for Disease Control's resources for research labs. Primer pairs used are described in [Table S1](#)

### SARS-CoV-2 copy numbers

SARS-CoV-2 RNA transcript levels in infected samples were quantified by comparing them to a standard curve generated using serial ten-fold dilutions ( $10^1$ - $10^9$  copies) of a SARS-CoV-2 N gene containing plasmid.

### Bulk RNA sequencing

2 days after SARS-CoV-2 infection, cells were lysed in RLT buffer and total RNA was extracted for bulk RNA sequencing using a QIAGEN RNEasy Mini Kit. RNA quality was analyzed using the 2100 Bioanalyzer (Agilent Technologies) and quantified using Qubit<sup>TM</sup> (ThermoFisher Scientific). Library construction was performed by the Cedars-Sinai Applied Genomics, Computation and Translational Core using the Lexogen RiboCop rRNA Depletion kit and Swift Biosciences RNA Library Sciences. Sequencing was performed using the NovaSeq 6000 (Illumina) with single-end 75bp sequencing chemistry. On average, about 20 million reads were generated from each sample. Raw reads were aligned using Star aligner 2.6.1 ([Dobin et al., 2013](#))/RSEM 1.2.28 ([Li and Dewey, 2011](#)) with default parameters, using a custom human GRCh38 transcriptome reference downloaded from <https://www.genencodegenes.org>, containing all protein coding and long non-coding RNA genes based on human GENCODE version 33 annotation with SARS-Cov2 virus genome MT246667.1 <https://www.ncbi.nlm.nih.gov/nucore/MT246667.1>.

Differential gene expression was determined by DESeq2 ([Love et al., 2014](#)). Top differential genes were determined based on fold change and test statistics. Pathway analysis was performed using Ingenuity Pathway Analysis.

### QUANTIFICATION AND STATISTICAL ANALYSIS

Statistical analysis was performed using GraphPad Prism version 8 software. Data are presented as linear fold change or  $\log_2$  fold change  $\pm$  SEM. SARS-CoV-2 infection time course for ALI and alveolar cultures was analyzed using Two-Way ANOVA with Sidak's post hoc correction. Drug validation experiments were analyzed using One-way ANOVA with Tukey's post hoc correction. N numbers and p values are indicated in corresponding figure legends. TPM counts and relative gene expression for ISGs between MOCK and infected cultures were analyzed using Two-tailed t tests. \*p < 0.5, \*\*p < 0.01, \*\*\*p < 0.001, \*\*\*\*p < 0.0001.

**Cell Reports, Volume 35**

**Supplemental information**

**SARS-CoV-2 infection of primary  
human lung epithelium for COVID-19  
modeling and drug discovery**

**Apoorva Mulay, Bindu Konda, Gustavo Garcia Jr., Changfu Yao, Stephen Beil, Jaquelyn M. Villalba, Colin Koziol, Chandani Sen, Arunima Purkayastha, Jay. K. Kolls, Derek A. Pociask, Patrizia Pessina, Julio Sainz de Aja, Carolina Garcia-de-Alba, Carla F. Kim, Brigitte Gomperts, Vaithilingaraja Arumugaswami, and Barry R. Stripp**

## Supplemental files





1  
2

**Fig. S1. Differential expression of genes between SARS-CoV-2 and MOCK infected samples, Related to Figure 3**

**A**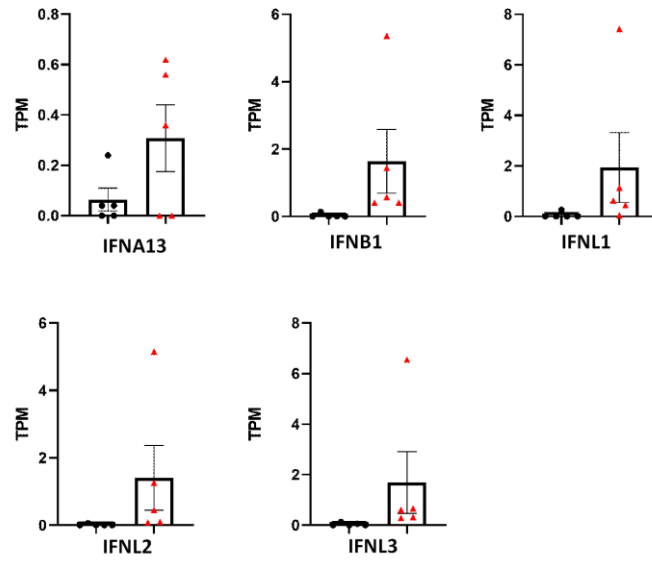**B**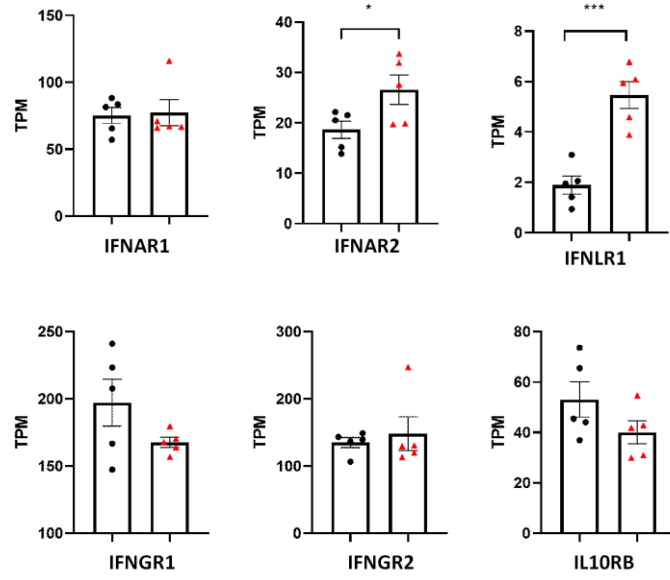**C**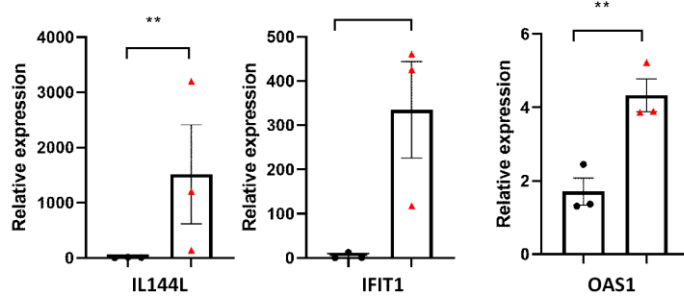

1  
2

**Fig. S2. SARS-CoV-2 induces an interferon proinflammatory response in AT2 cells, Related to Figure 3.**

1  
2

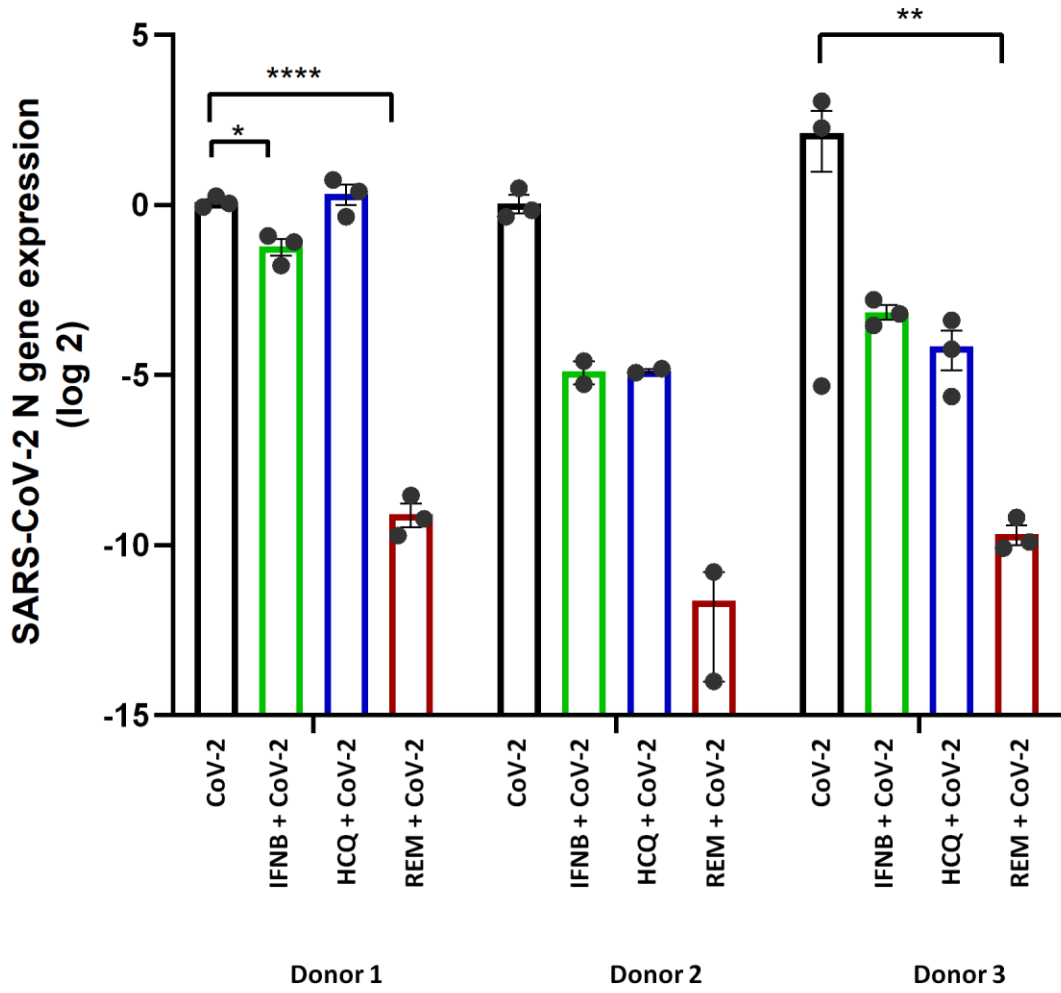

3

4

Fig. S3. Effect of drugs on alveolar cultures from individual biological replicates, Related to Figure 4.



| Gene         | Forward primer              | Reverse primer                  |
|--------------|-----------------------------|---------------------------------|
| 2019-nCoV_N1 | GAC CCC AAA ATC AGC GAA AT  | TCT GGT TAC TGC CAG TTG AAT CTG |
| GAPDH        | CCA CCT TTG ACG CTG GG      | CAT ACC AGG AAA TGA GCT TGA CA  |
| IFI44L_FWD   | TGA CTT CTC AAA GCC GGG TC  | AAA AAT CAT CTG CAG CCC GC      |
| IFIT1_FWD    | CCT CAG TCT TGC AGC CTC TC  | GCA GTG CAG AAA GTG AGA CC      |
| OAS1         | TTC GGA CGG TCT TGG AAT TAG | GCT GCC TTC TCA GGT ACT TT      |

1  
2  
3  
4  
5

**Table S1. List of primer sequences used for RT-qPCRs, Related to STAR methods section ‘Real Time Quantitative PCR(RT-PCR)’**
